1           **Design and approval of the nutritional warnings' policy in Peru:**  
2           **Milestones, key stakeholders, and policy drivers for its approval**

3           **Short title: Design and approval of the nutritional warnings' policy in Peru**

4           Diez-Canseco, Francisco<sup>1\*</sup>; Cavero, Victoria<sup>1¶</sup>; Álvarez-Cano, Juan<sup>1¶</sup>; Saavedra-Garcia, Lorena<sup>1,2&</sup>;  
5           Taillie, Lindsey Smith<sup>2,3&</sup>; Dillman Carpentier, Francesca<sup>4&</sup>; Miranda, J. Jaime<sup>1,5&</sup>

6           <sup>1</sup> CRONICAS Center of Excellence of Chronic Diseases, Universidad Peruana Cayetano Heredia, Lima, Peru.

7           <sup>2</sup> Carolina Population Center, University of North Carolina at Chapel Hill, Chapel Hill, North Carolina, United States of  
8           America

9           <sup>3</sup> Department of Nutrition, Gillings School of Global Public Health, University of North Carolina at Chapel Hill, Chapel  
10           Hill, North Carolina, United States of America

11           <sup>4</sup> Hussman School of Journalism and Media, University of North Carolina at Chapel Hill, Chapel Hill, North Carolina,  
12           United States of America

13           <sup>5</sup> Department of Medicine, School of Medicine, Universidad Peruana Cayetano Heredia, Lima, Peru

14

15           \*Corresponding author: [francisco.diez.canseco.m@upch.pe](mailto:francisco.diez.canseco.m@upch.pe) (FDC)

16

17           <sup>¶</sup>These authors contributed equally to this work

18           <sup>&</sup>These authors also contributed equally to this work

19 **ABSTRACT**

20 **Background:** Nutritional warnings are used as a public health strategy to prevent increases in obesity  
21 prevalence. Peru approved in 2013 and implemented in 2019 a Law requiring nutritional warnings on the  
22 marketing and packaging of processed foods high in sugar, sodium, saturated fat, and containing trans-  
23 fat. The complexity behind the implementation of this set of policies over six years provide unique  
24 learnings, essential to inform the obesity prevention context, especially when facing strong opposition  
25 from powerful stakeholders such as the food industry.

26 **Aims:** Describe milestones and key stakeholders' roles and stances during the nutritional warnings policy  
27 design in Peru; and identify and analyze the main drivers of policy change that explain its approval.

28 **Methodology:** In 2021, interviews were conducted with 25 key informants, advocates and opponents of  
29 the policy, closely involved in its design. Interviews were analyzed using the Kaleidoscope Model as a  
30 theoretical framework. Relevant policy documents and news were also analyzed.

31 **Results:** Milestones for this policy were the approval of the Law, Regulation, and Manual. Policy  
32 supporters were mainly from the Congress, civil society organizations, and Health Ministers; whereas  
33 opponents came from other parties in the Congress, ministries linked to the economic sector, the food  
34 industry, and media. Across the years, warning's evolved from a single text, to traffic lights, to the  
35 approved black octagons. Main challenges included the strong opposition of powerful stakeholders; the  
36 lack of agreement for defining the appropriate evidence for nutritional warning parameters and design;  
37 and the political instability of the country. Based on the Kaleidoscope Model, the policy successfully  
38 targeted a relevant problem (unhealthy eating decisions) and had powerful advocates who effectively  
39 used focusing events to reposition the warnings in the policy agenda across the years. Negotiations  
40 weakened the policy but led to its approval. Importantly, government veto players were mostly in favor of  
41 the policy, which enabled its final approval despite the strong opposition.

42 **Conclusions:** Despite the strong opposition faced and technical and political difficulties to define the best  
43 parameters and warnings' design, Peru's nutritional warnings policy was approved. Lessons learned are  
44 essential to inform similar and related prevention policies in Peru and elsewhere.

## 45 I. INTRODUCTION

46 The prevalence of overweight and obesity in many Latin American countries is increasing more than one  
47 percentage point per year (1). This rise has been associated with a greater availability of ultra-processed  
48 foods with high contents of sodium, sugars, and saturated fats, which increase the risk of obesity and  
49 related non-communicable diseases (NCDs) (2). One strategy to address this problem is the use of  
50 nutritional warnings in processed foods' front-of-package (FoP) labels, which have been recently  
51 implemented in Latin American countries, such as Chile, Peru, Uruguay, and Mexico (3). These nutritional  
52 warnings inform the public about the high content of nutrients of concern, such as sugar, sodium, and fats  
53 (3).

54 Peru has a long history of undernutrition, but in the last decades, childhood overweight and obesity  
55 increased from 25% in 2007 to 38% in 2018 (4). To address this problem, in 2013 Peru launched the  
56 Healthy Eating Law (Law 30021), which included the use of nutritional warnings on the processed foods  
57 FoP labels and their publicity (5). However, the warnings had to overcome multiple barriers and did not  
58 enter into force until six years later, a larger process compared to other countries in the region, such as  
59 Chile (6) or Uruguay (7). Indeed, in contrast to Chile (8) or Mexico (9, 10), whose policies processes have  
60 been studied and their main challenges, successes, and potential improvements described, the policy in  
61 Peru has received little attention. Importantly, Peru included the warnings into a regulation that makes it  
62 mandatory for the food industry to comply, and which is joined by other initiatives to promote healthy  
63 eating, making it relevant for other low- and middle-income countries (LMICs) who might implement this  
64 type of policy.

65 We performed a qualitative study to analyze the nutritional warnings' policy design process, using the  
66 Kaleidoscope Model of change in agricultural and nutrition policies (11). This model was designed to be  
67 used in LMICs, such as Peru, and provides a framework for analyzing why policy-related changes occur;  
68 for example, the implementation of a new policy. The model is based on five stages of the political  
69 process: agenda setting, design, adoption, implementation, and evaluation and reform, and propose a  
70 series of hypotheses to explain the success of a given policy.

71 In this paper, we describe the milestones and key stakeholders’ roles and stances during the design and  
 72 approval of the nutritional warnings’ policy in Peru (2013-2019) and analyze the policy drivers that might  
 73 explain why this policy was finally designed and approved, despite the strong opposition that it faced over  
 74 the years. To do so, we used the first three stages of the Kaleidoscope Model (agenda setting, design,  
 75 and adoption), which entails a total of nine determinants and hypotheses, as shown in Table 1:

76 **Table 1. Components of the Kaleidoscope Model**

| Policy stage   | Determinant of policy change         | Hypothesis to explain the determinant of policy change                                                                                                                                                                         |
|----------------|--------------------------------------|--------------------------------------------------------------------------------------------------------------------------------------------------------------------------------------------------------------------------------|
| Agenda setting | Recognized, relevant problem         | (H1): A concerned constituency identifies a relevant problem based on credible evidence or popular perception                                                                                                                  |
|                | Focusing event                       | (H2): A well-defined event focuses public attention on a problem or creates a window of opportunity for policy change                                                                                                          |
|                | Powerful advocates                   | (H3): Strong individuals, organizations, or companies support a new or changed policy to key decision makers.                                                                                                                  |
| Design         | Knowledge and research               | (H4): Evidence-based knowledge shapes feasible design options.                                                                                                                                                                 |
|                | Norms, biases, ideology, and beliefs | (H5): Beliefs and biases shape the range of design features that are acceptable                                                                                                                                                |
|                | Cost-benefit calculations            | (H6): Expected costs and expected benefits (political, economic, social) determine preferred design                                                                                                                            |
| Adoption       | Powerful opponents vs proponents     | (H7): For a policy to be adopted, supporters must be relatively more powerful than opponents.<br>For a policy to not be adopted, opponents must be relatively more powerful than supporters                                    |
|                | Government veto players              | (H8): For a policy to be adopted, government agents with ultimate decision-making power must be supportive or neutral.<br>For a policy to be vetoed, government agents with ultimate decision-making power must be an opponent |
|                | Propitious timing                    | (H9): Supporters wait for opportune moments (political, economic, social) to push policy change                                                                                                                                |

77 Source: Haggblade & Babu (2017) (12)

78 **II. Methods**

## 79 **1. Context about the nutritional warnings policy in Peru**

80 The nutritional warnings policy in Peru comprises three main documents: The Law 30021, its Regulation,  
81 and the Nutritional Warnings Manual. In May 2013, the Peruvian Congress enacted Law 30021 (5) to  
82 reduce children and adolescents' overweight and obesity and prevent NCDs. The Law contains six  
83 strategies, including the use of nutritional warnings (later designed as black octagons) on the processed  
84 foods FoP labels and their publicity. To implement the strategies, the Law delegated the Ministry of  
85 Health (MoH) to design a regulation, based on recommendations of the World Health Organization  
86 (WHO) or the Pan American Health Organization (PAHO), to establish parameters for maximum levels of  
87 sugar, sodium, saturated fat, and trans-fat for processed foods and beverages. If one or more of these  
88 parameters were surpassed, the corresponding nutritional warning would be used. The MoH had 60 days  
89 to prepare the regulation, which entailed a policy document to specify the Law's contents. The Law,  
90 however, was not approved until four years later, in June 2017. This Regulation (13) specified two  
91 implementation dates of the warnings, with stricter nutritional parameters for the second one; and  
92 commissioned the MoH the preparation of a "Nutritional Warnings Manual" to detail the warnings' design  
93 (e.g., shape, size, color, etc.). The Manual (14) was approved in June 2018, and the implementation of  
94 the nutritional warnings begun in June 2019, followed by the introduction of the stricter parameters in  
95 September 2021.

96 The design and approval of these three documents (Law, Regulation and Manual) faced strong  
97 opposition from the food industry and from powerful stakeholders in different sectors and levels of the  
98 government, e.g., political parties in the Congress, or Ministries linked to the economic sector. However,  
99 the policy also had highly committed advocates in Congress, civil society organizations, PAHO, and  
100 decision makers in the MoH and central government.

## 101 **2. Study design.**

102 A qualitative study, consisting of semi-structured interviews with stakeholders, was performed during  
103 2021 to collect first-hand information about the process of designing and approving of the nutritional  
104 warnings policy in Peru.

## 105 **3. Participants.**

106 The informants were stakeholders, from different backgrounds and sectors, closely involved in the design,  
107 implementation and/or monitoring of the nutritional warnings policy in Peru. The selection of participants  
108 aimed to invite up to 25 key informants, advocates and opponents of the policy, representing: (1) local  
109 policymakers (2) politicians, (3) international organization representatives, (4) civil society advocates, (5)  
110 industry and media representatives, and (6) researchers. Some participants filled more than one role at  
111 different time-points (i.e., policymaker and civil society advocate). A purposive sampling strategy was  
112 used to select key informants who could provide detailed descriptions and valuable insights about the  
113 policy process from different perspectives. We interviewed 25 informants, as shown in Table 2.

114 **Table 2. Total of informants per sector**

| Sector                                                                                                      | Informants |
|-------------------------------------------------------------------------------------------------------------|------------|
| <u>Policymakers</u> : Former ministers, responsible of designing the Regulation's and Manual's drafts       | 9          |
| <u>Members of Congress</u> : Supporting and opposing the policy (based on votes, bills to modify the Law)   | 3          |
| <u>International organization representatives</u> : Former and current representatives                      | 3          |
| <u>Civil society advocates</u> : Former and current representatives involved in the policy                  | 4          |
| <u>Industry and media representatives</u> : Representatives from associations and from individual companies | 3          |
| <u>Researchers</u> : Market studies' researchers and master students                                        | 3          |
| <b>Total</b>                                                                                                | <b>25</b>  |

115 **4. Data collection tools.**

116 One semi-structured interview guideline was developed and organized into seven sections comprising  
117 questions about the design, implementation, and audit of the nutritional warnings policy in Peru. This  
118 comprehensive guideline was adapted to each interviewee, prioritizing those topics closer to their  
119 experience during the policy design, implementation, and audit. New queries emerged during the data  
120 collection and were included in the following interviews if relevant.

121 Additionally, a rapid search using Google engines was conducted to retrieve news and policy  
122 documentation about the nutritional warnings policy to contextualize the interviewees' information and  
123 better understand the main policy contents and events. Search terms included “nutritional warnings”,

124 “octagons”, “healthy eating law”, and “Law 30021”. News were selected from Jan 1<sup>st</sup>, 2011 to June 30<sup>th</sup>,  
125 2018, when the Manual was approved. Likewise, and using the Peruvian Government official website  
126 ([www.gob.pe](http://www.gob.pe)), the main policy documentation (i.e., the approved Law, Regulation and Manual, as well as  
127 previous and later drafts) were collected.

## 128 **5. Procedures.**

129 Interviews were conducted in Spanish between January and September 2021 through video calls and  
130 were facilitated by four researchers involved in the project since its conception. All interviews were audio  
131 recorded after obtaining informants’ consent, and their average duration was 84 minutes (range: 53–118  
132 minutes). When necessary, more than one session was arranged to cover all the main topics of the  
133 interview guideline. News and policy documentation were read and summarized by one researcher  
134 involved in the interview process.

## 135 **6. Data analysis.**

136 Interview recordings were transcribed and a directed qualitative content analysis was performed (15)  
137 using ATLAS.ti 9. All interviews were double coded by two trained researchers, who lead or attended the  
138 interviews.

139 An initial codebook was developed based on the interview guideline’s topics, with the aim of capturing  
140 essential milestones of the policy design and approval (i.e. approval of policy documents about the  
141 nutritional warnings), the role and stances of main stakeholders, and variables from the Kaleidoscope  
142 Model (e.g., focusing event, ). Before coding, the team met to standardize the procedure and  
143 understanding of the codes to be used. Along the coding process, emerging codes were discussed to  
144 decide if they would be added to the codebook. Disagreements were solved by discussions with another  
145 member of the research team. The final codebook had 124 codes (Supplementary Material). This  
146 manuscript mainly presents the analysis of codes referring to the policy agenda setting, design, and  
147 adoption, from 2013 to 2019. The implementation and audit processes are described elsewhere.  
148 Additionally, the most relevant policy documentation and news about the nutritional warnings’ design and  
149 approval were used to contextualize and triangulate the informants’ discourses and to prepare a timeline  
150 of main events.

151 **7. Ethical considerations.**

152 The study was approved by Institutional Review Boards at Universidad Peruana Cayetano Heredia and  
153 University of North Carolina at Chapel Hill. All interviewees gave informed consent. Some signed a virtual  
154 form while others gave oral consent during a recorded phone call.

155 **III. Results**

156 Results are divided in two sections. First, we present the milestones during the nutritional warnings'  
157 design by describing the processes of designing and approving the Law 30021, its Regulation, and the  
158 Manual (Table 3), as well as the role of key stakeholders along the years (Figures 1-3). We also outline  
159 how the nutritional warnings' parameters and design were defined along the years and summarize the  
160 main challenges faced during these processes. Based on this narrative, in our second section we use the  
161 Kaleidoscope Model to analyze how and why this policy was ultimately approved, despite the long  
162 periods and strong opposition. Hypotheses derived from the key contextual factors, actions, and actors  
163 associated with the model's stages of agenda-setting, design, and adoption (see Table 1) are addressed  
164 in this second section.



165 **Table 3. Timeline of main events related to the Nutritional Warnings Policy's design and approval in Peru, 2011-2019.**

| Year | Policy Events                                                                    | Political Events                                                                                                                                 | Scientific Events                                                                                                                                                                    | Other Events                                                                                                                                                                                                           |
|------|----------------------------------------------------------------------------------|--------------------------------------------------------------------------------------------------------------------------------------------------|--------------------------------------------------------------------------------------------------------------------------------------------------------------------------------------|------------------------------------------------------------------------------------------------------------------------------------------------------------------------------------------------------------------------|
| 2011 |                                                                                  |                                                                                                                                                  | - 2011: Report: Recommendations of the PAHO Expert Consultation on the Promotion and Advertising of Foods and Non-alcoholic Beverages to Children in the Region of the Americas (17) | - PAHO: May 12-13: Expert Consultation on the Promotion and Advertising of Foods and Non-alcoholic Beverages to Children in the Region of the Americas, convened by PAHO/WHO (17)                                      |
|      |                                                                                  | - Jul 27: The new elected Congress begins their activities (16)                                                                                  |                                                                                                                                                                                      |                                                                                                                                                                                                                        |
| 2011 |                                                                                  | Jul 28: Ollanta Humala assumes the presidency (18)<br>(Party: Peruvian Nationalist Party, majority in Congress - 47 congressmen out of 130) (16) |                                                                                                                                                                                      |                                                                                                                                                                                                                        |
|      |                                                                                  |                                                                                                                                                  |                                                                                                                                                                                      | - Peru: Nov 17-19: 5th National Health Conference (19)<br>- Peru: Dec 30: Civil society organization's (Foro Salud) Policy Statement at the 5th National Health Conference asking for regulations to prevent NCDs (20) |
| 2012 | - Jan 30: First bill (Law draft) 774/2011-CR (21)                                |                                                                                                                                                  | - Jan 23: Study of unhealthy food advertising on Peruvian television - CONCORDTV (25)                                                                                                | - Chile: Jun 06: Enactment of Law 20606 in Chile - "About the nutritional composition of foods and their advertising" (26)                                                                                             |
|      | - Jan 30: Second bill 775/2011-CR (22)<br>- Apr 23: Third bill 1038/2011-CR (23) | - Jul 23: Dr. Midori de Habich becomes new Minister of Health (24)                                                                               |                                                                                                                                                                                      |                                                                                                                                                                                                                        |
| 2013 | <b><u>17/05: Enactment of the Healthy Eating Law (Law 30021) (5)</u></b>         |                                                                                                                                                  |                                                                                                                                                                                      |                                                                                                                                                                                                                        |
| 2014 | - Mar 24: Prepublication of the first Regulation's draft (27)                    | - Nov 05: Dr. Anibal Velásquez becomes new Minister of Health (28)                                                                               | - Journal Article: May: "Percentile values for sugar, fat and sodium                                                                                                                 | - Ecuador: August: Approval of the "Substitute Sanitary Regulation for                                                                                                                                                 |

|      |                                                                                                                                                                                                                                                       |                                                                                                                                                                                      |                                                                                                                                                                                                                                  |
|------|-------------------------------------------------------------------------------------------------------------------------------------------------------------------------------------------------------------------------------------------------------|--------------------------------------------------------------------------------------------------------------------------------------------------------------------------------------|----------------------------------------------------------------------------------------------------------------------------------------------------------------------------------------------------------------------------------|
|      |                                                                                                                                                                                                                                                       | content in industrialized foods according to labeling issued in Lima" (29)                                                                                                           | Processed Foods for Human Consumption 5103", which mandates the use of traffic lights (30)                                                                                                                                       |
|      |                                                                                                                                                                                                                                                       |                                                                                                                                                                                      | - PAHO: Sep 29 – Oct 03: 53rd PAHO Directing Council - approval of the action plan for the prevention of obesity in childhood and adolescence (Requests PAHO to provide technical parameters based on scientific evidence) (31)  |
| 2015 | - Mar 20: Bill 4343/2014-CR bill to modify Law 30021 (32)<br>- Apr 17: Approval of a Regulation using the technical parameters of PAHO's Expert Recommendations (never implemented) (33)<br>- Sep 10: Bill 4808/2015-CR bill to modify Law 30021 (34) |                                                                                                                                                                                      | - Chile: Jun 26: Regulation of Law 20606 - Establishment of technical parameters and black octagons as warnings (36)<br>- Peru: May 18: "Healthy Eating Walk" led by the College of Nutritionists of Peru (37)                   |
| 2016 | - Feb 25: Ministry of Justice's Dictum regarding the Law 30021 scope<br>- Jul 25: Prepublication of the second Regulation's draft (38)<br>- Jul 27: Approval of Trans-Fat's Regulation (39)                                                           | - Jul 27: The new elected Congress begins their activities (40)                                                                                                                      | - Report: WHO Regional Office for Europe - Nutrient Profile Model (35)<br>- Report: PAHO Nutrient Profile Model (41)<br>- Use of the PAHO Nutrient Profile Model in Peruvian processed foods (conducted by the MoH, unpublished) |
|      |                                                                                                                                                                                                                                                       | Jul 28: Pedro Pablo Kuczynski assumes the presidency<br>(Party: Peruvians for Change; opponent party <i>Fuerza Popular</i> has majority in Congress -73 congressmen out of 130) (42) |                                                                                                                                                                                                                                  |
|      |                                                                                                                                                                                                                                                       | - Jul 28: Patricia García becomes new Minister of Health (43)                                                                                                                        |                                                                                                                                                                                                                                  |
| 2017 | - Jan 11: Bill 865/2016-CR, bill to modify Law 30021 (44)                                                                                                                                                                                             | - Sep 17: Fernando D'Alessio                                                                                                                                                         | - Population's perceptions of<br>- Panama: Jun 02: "Pura Vida" scandal:                                                                                                                                                          |

- Jun 12: Bill 1519/2016-CR, bill to modify Law 30021 (45)
- **Jun 17: Approval of the Regulation of the Law 30021 (13)**
- Jun 23: Bill 1589/2016-CR, bill to modify Law 30021 (46)
- Jul 24: Bill 1700/2016-CR, bill to modify Law 30021 (47)
- Aug 17: Prepublication of the first draft of the Nutritional Warnings' Manual (48)
- Oct 04: Bill 1959/2017-CR bill to modify Law 30021 (49)
- Oct 19: Bill 2036/2017-CR bill to modify Law 30021 (50)
- Nov 17: The Congress' Working group approves the Dictum to modify the Law 30021 (51)

---

- Mar 09: Approval of Dictum that modifies the Law 30021 (59)
- Mar 28: Congress send the approved Dictum to the President (60)
- **Jun 16: Approval of the Nutritional Warnings' Manual (14)**

---

- 2018

---

- Mar 23: President Kuczynski resigns and Martin Vizcarra, his vice-president, is elected president (63)

---

- Apr 02: Silvia Pessah becomes new Minister of Health (64)
- June: Keiko Fujimori (*Fuerza Popular*) leader and daughter of Alberto Fujimori) meets with President Vizcarra to ask him not to approve the octagons as design for

- becomes new Minister of Health (52)
- Dec 21: First impeachment motion to President Kuczynski (53)
- Dec 24: President Kuczynski's pardon to incarcerated and former dictator Alberto Fujimori (54)
- Jan 09: Abel Salinas becomes new Minister of Health (61)
- Mar 21: Kuczynski resigns as president (62)

- processed foods (conducted by the MoH, unpublished)
- Qualitive study of the Peruvian population's preferences about the nutritional warnings (conducted by the MoH, unpublished)

- Panama stops commercialization of the dairy product "Pura Vida" (55)
- Peru: October: Presentation of "NutriAPP" app (56)
- Peru: Jun 19: Protest by civil society led by the College of Nutritionists of Peru against the Regulation of Law 30021. (57)
- Peru: Sep 20: Demand of the College of Nutritionists of Peru to MoH against the approved technical parameters. (58)

the nutritional warnings' design (65)

- 
- May 17: Publication of Questions & Answers to the industry about the Nutritional Warnings' Manual (66)
  - Jun 17: The first implementation phase begins (67)
- 

166

167 **Figure 1. Stances of key stakeholders during the Law 30021's design and approval (2012-2013)**

168 Stakeholders in the inner circle are those with higher power in the decision-making process

169 Abbreviations: Ministry of Health (MoH), Ministry de Economy and Finances (MEF), Ministry de Education (MoE), Ministry of Justice  
170 (MoJ), Ministry of Social Inclusion (MoS), Ministry of Foreign Trade and Tourism (MoF), Ministry of Agriculture (MoA), Ministry of  
171 Production (MoP), National Radio and Television Society (SNRTV), National Advertisers Association (ANDA), National  
172 Confederation of Private Entrepreneurial Institutions (CONFIEP), National Society of Industries (SNI), Non-alcoholic Beverage and  
173 Soft Drink Industry Association (ABRESA), Peruvian Association of Consumers and Users (ASPEC)

174

175 **Figure 2. Stances of key stakeholders during the Regulation's design and approval (2014-2017)**

176 Stakeholders in the inner circle are those with higher power in the decision-making process

177 Abbreviations: Ministry of Health (MoH), Ministry de Economy and Finances (MEF), Ministry de Education (MoE), Ministry of Justice  
178 (MoJ), Ministry of Social Inclusion (MoS), Ministry of Foreign Trade and Tourism (MoF), Ministry of Agriculture (MoA), Ministry of  
179 Production (MoP), National Radio and Television Society (SNRTV), National Advertisers Association (ANDA), National  
180 Confederation of Private Entrepreneurial Institutions (CONFIEP), National Society of Industries (SNI), Non-alcoholic Beverage and  
181 Soft Drink Industry Association (ABRESA), Peruvian Association of Consumers and Users (ASPEC)

182

183 **Figure 3. Stances of key stakeholders during the Nutritional Warnings Manual design and**  
184 **approval (2017-2018)**

185 Stakeholders in the inner circle are those with higher power in the decision-making process

186 Abbreviations: Ministry of Health (MoH), Ministry de Economy and Finances (MEF), Ministry de Education (MoE), Ministry of Justice  
187 (MoJ), Ministry of Social Inclusion (MoS), Ministry of Foreign Trade and Tourism (MoF), Ministry of Agriculture (MoA), Ministry of  
188 Production (MoP), National Radio and Television Society (SNRTV), National Advertisers Association (ANDA), National  
189 Confederation of Private Entrepreneurial Institutions (CONFIEP), National Society of Industries (SNI), Non-alcoholic Beverage and  
190 Soft Drink Industry Association (ABRESA), Peruvian Association of Consumers and Users (ASPEC)

## 191 **8. Milestones during the nutritional warnings' design**

### 192 **8.1. In 2013, nutritional warnings in FOP labels and publicity are included in the Law 30021**

#### 193 **8.1.1. Summary of how the Law was designed and approved**

194 According to our informants, the nutritional warnings in Peru aimed to reduce obesity and promote  
195 healthy eating habits in children and adolescents by 1) informing the population about the high content of  
196 nutrients of concern in processed food; 2) encouraging the consumption of healthier options (with less or  
197 no warnings); and 3) encouraging the food industry to improve the nutritional content of their products.  
198 These warnings reached de Peruvian policy agenda as one of the six components of the "Healthy Eating  
199 Law" (Law 30021) (5).

200 This Law was the result of three bills (Law drafts) designed by Peruvian congressmen from different  
201 parties between January and April 2012 (21-23). These bills were merged into one single text and  
202 discussed in the Congress for several months, when the text was constantly edited mainly based on  
203 critics from media and food industry representatives but also on some recommendations from public  
204 institutions, civil society organizations, and PAHO (68). Despite the strong opposition and influence of  
205 food industry and media representatives, congressmen in favor of the Law were majority than those  
206 against, which enabled its enactment and further endorsement of the country President Humala (2011-  
207 2016), in May 2013. The constant editions removed important elements that many interviewees regretted,  
208 but they also commented that it was the best that could be achieved after all the opposition received.

209 "The congressman who was in charge told me 'Ms. that's what was possible, this is the Law that we were  
210 able to do'. (...) So, yes, that left me thinking a lot. I then began to say: 'The Law is not perfect, but it is the  
211 only thing, the best we have been able to achieve and with this imperfect Law we can now move forward'".  
212 (Civil society organization's representative, SOC-01)

#### 213 **8.1.2. Definition of the nutritional warnings' parameters in the period of designing the Law**

214 Nutritional warnings required parameters to define the maximum nutrients' content that a processed  
215 product could have to avoid the warning in its FOP label and publicity. The third bill (before the Law) (23)  
216 proposed using a set of parameters produced during an PAHO expert consultation in 2011 (17), which  
217 established maximum contents of sugar, fat, sodium, and trans-fat for solid (grams) and liquid (milliliters)

218 processed foods (Table 4). However, opponents argued that these parameters were based on experts'  
219 opinions and not on an official PAHO document nor scientific evidence. This argument was supported by  
220 the National Institute for the Defense of Free Competition and the Protection of Intellectual Property  
221 (Indecopi) (68), the governmental institution in charge of auditing the nutritional warnings' implementation.  
222 Thereby, the Law did not include any parameter but instead commissioned the MoH to define them in a  
223 further Regulation (5). This Regulation should be published in no more than 60 days and parameters  
224 should be "based on recommendations from WHO/PAHO".

225 **Table 4. Timeline of parameters for maximum levels of sugar, saturated fat, sodium, and trans-fat in processed foods and beverages,**  
 226 **including those proposed by WHO/PAHO and those used in the nutritional warnings' policy documents**

| Year                                                        | Documents                                                                                                                                                     | Phases       | Food category               | Total sugar  | Saturated fat | Sodium         | Energy          | Trans fat                                                               |  |
|-------------------------------------------------------------|---------------------------------------------------------------------------------------------------------------------------------------------------------------|--------------|-----------------------------|--------------|---------------|----------------|-----------------|-------------------------------------------------------------------------|--|
| 2008                                                        | Trans Fat Free Americas - Rio de Janeiro Declaration*                                                                                                         | Single phase | Oils and margarines         |              |               |                |                 | < 2% total fat                                                          |  |
|                                                             |                                                                                                                                                               |              | Processed foods             |              |               |                |                 | < 5% total fat                                                          |  |
| 2011                                                        | Recommendation of the PAHO expert consultation on the promotion and advertising of food and nonalcoholic beverages to children in the Region of the Americas* | Single phase | Solid food                  | ≥ 5g/100g    | ≥ 1.5g/100g   | ≥ 300mg/100g   |                 | > 0 gr                                                                  |  |
|                                                             |                                                                                                                                                               |              | Beverages                   | ≥ 2.5g/100ml | ≥ 0.75g/100ml | ≥ 300mg/100ml  |                 | > 0 gr                                                                  |  |
| 2014                                                        | First draft of the Regulations of Law N°30021 (Based on CENAN study) (RM 321-2014/MINSA)**                                                                    | Single phase | Non-alcoholic beverages     | ≥ 8.1g/100ml | ≥ 5.3g/100ml  | ≥ 540mg/100ml  |                 | Fats, vegetable oils and margarines: ≥ 2g/100g or 100ml of fatty matter |  |
|                                                             |                                                                                                                                                               |              | General solid foods         | ≥ 12.5g/100g | ≥ 5.3g/100g   | ≥ 540mg/100g   |                 | Other industrially processed food and non-alcoholic beverages           |  |
|                                                             |                                                                                                                                                               |              | Grains and derivatives      | ≥ 12.5g/100g | ≥ 3.4g/100g   | ≥ 540mg/100g   |                 |                                                                         |  |
|                                                             |                                                                                                                                                               |              | Cakes, biscuits and cookies | ≥ 19.6g/100g | ≥ 9.8g/100g   | ≥ 540mg/100g   |                 |                                                                         |  |
|                                                             |                                                                                                                                                               |              | Snacks                      | ≥ 12.5g/100g | ≥ 7g/100g     | ≥ 540mg/100g   |                 | 5g/100g or 100ml of fatty matter                                        |  |
| Regulations technical parameters – MINSA (DS 007-2015-SA)** | Single phase                                                                                                                                                  | Solid food   | ≤ 5g/100g                   | ≤ 1.5 g/100g | ≤ 300 mg/100g |                |                 |                                                                         |  |
|                                                             |                                                                                                                                                               |              | Beverages                   | ≤ 2.5g/100ml | ≤ 0.75g/100ml | ≤ 300 mg/100ml |                 |                                                                         |  |
| 2015                                                        | Chilean technical parameters*                                                                                                                                 | 1st phase    | Solid food                  | > 22.5g/100g | > 6g/100g     | > 800mg/100g   | > 350 Kcal/100g |                                                                         |  |
|                                                             |                                                                                                                                                               |              |                             | Beverages    | > 6g/100ml    | > 3g/100ml     | > 100mg/100g    | > 100 Kcal/100ml                                                        |  |
|                                                             |                                                                                                                                                               | 2nd phase    | Solid food                  | > 15g/100g   | > 5g/100g     | > 500mg/100g   | > 300 Kcal/100g |                                                                         |  |
|                                                             |                                                                                                                                                               |              |                             | Beverages    | > 5g/100ml    | > 3g/100ml     | > 100mg/100g    | > 80 Kcal/100ml                                                         |  |
|                                                             |                                                                                                                                                               | 3rd phase    | Solid food                  | > 10g/100g   | > 4g/100g     | > 400mg/100g   | > 275 Kcal/100g |                                                                         |  |



|      |                                    |        |                                                               |                       |                       |               |                                                                             |
|------|------------------------------------|--------|---------------------------------------------------------------|-----------------------|-----------------------|---------------|-----------------------------------------------------------------------------|
|      |                                    | phase  | Beverages                                                     | > 5g/100ml            | > 3g/100ml            | > 100mg/100g  | > 70 Kcal/100ml                                                             |
|      | Pan American Health Organization   | Single | Solid food                                                    | ≥ 10% of total energy | ≥ 10% of total energy | ≥ 1 mg/1 Kcal | ≥ 1% of total energy                                                        |
|      | nutrient profile model*            | phase  | Beverages                                                     | ≥ 10% of total energy | ≥ 10% of total energy | ≥ 1 mg/1 Kcal | ≥ 1% of total energy                                                        |
|      | Second draft of the Regulations to | Single | Solid food                                                    | ≥ 10% of total Kcal   | ≥ 10% of total Kcal   | ≥ 1 mg/Kcal   |                                                                             |
|      | Law N° 30021                       | phase  | Beverages                                                     | ≥ 10% of total Kcal   | ≥ 10% of total Kcal   | ≥ 1 mg/Kcal   |                                                                             |
| 2016 | (RM 524-2016/MIINSA)**             |        |                                                               |                       |                       |               |                                                                             |
|      |                                    | 1st    | Fats, vegetable oils and margarines                           |                       |                       |               | ≥ 2g/100g o 100ml of fatty matter                                           |
|      | Trans fat regulation               | phase  | Other industrially processed food and non-alcoholic beverages |                       |                       |               | ≥ 5g/100g o 100ml of fatty matter                                           |
|      | (DS 033-2016-SA)**                 | 2nd    | All processed foods                                           |                       |                       |               | Elimination of the use and content of trans fats from partial hydrogenation |
|      |                                    | 1st    | Solid food                                                    | ≥ 22.5g/100g          | ≥ 6g/100g             | ≥ 800 mg/100g |                                                                             |
| 2017 | Regulation of Law N° 30021         | phase  | Beverages                                                     | ≥ 6g/100ml            | ≥ 3g/100ml            | ≥ 100mg/100ml |                                                                             |
|      | (DS 017-2017-SA)**                 | 2nd    | Solid food                                                    | ≥ 10g/100g            | ≥ 4g/100g             | ≥ 400mg/100g  |                                                                             |
|      |                                    | phase  | Beverages                                                     | ≥ 5g/100ml            | ≥ 3g/100ml            | ≥ 100mg/100g  |                                                                             |

227 \* Parameters published by WHO/PAHO

228 \*\* Parameters used in the Peruvian policy documents

### 229 **8.1.3. Proposed nutritional warnings in the period of designing the Law**

230 The Law did not mention any specific design for the nutritional warnings but only the following texts: “High  
231 in [sodium/sugar/fat]: Avoid its excessive consumption” and “Contains trans-fat: Avoid its consumption”,  
232 specifying that they should be clearly seen in the products’ FoP labels and their publicity (5), similar to the  
233 warnings used in tobacco. According to our informants, neither the policy advocates nor opponents  
234 proposed any specific design in terms of shape or colors when designing the Law. See Figure 4 to  
235 appreciate the different designs proposed across time and Table 5 to understand how the warnings  
236 design changed from traffic light label to a warning label.

#### 237 **Figure 4. Nutritional warnings’ designs proposed during the main policy documents design**

238 \*Only these designs were published in official documents

239 The Law specified the text for the nutritional warnings, similar to the ones used in tobacco. When designing the first Regulation  
240 Draft, its authors suggested using the traffic lights design, similar to the ones being used in Ecuador at that time. Since the second  
241 Regulation Draft, the authors suggested using the octagons design, but with some differences, such as color and shape.

### 242 **8.1.4. Main challenges faced when trying to approve the Law 30021**

243 Main challenges in this period were 1) the strong opposition of food industry and media representatives to  
244 some aspects of the Law and 2) the little scientific evidence to define the nutritional warnings’  
245 parameters. Arguments used by those in favor and against the warnings can be found in Table 5.  
246 Importantly, some informants said that during this period, opponents were mainly focused on the  
247 regulations to publicity (another component of the Law) rather than in the nutritional warnings, which  
248 might have eased including the warnings in the Law. However, this strong opposition risked the approval  
249 of the Law.

250 “People from the Society of Radio and TV said: ‘You know what, this project can’t be approved with that  
251 [regulations to publicity]. We are not interested if you put labels, whatever... [but] don’t mess with publicity’.  
252 The same day, someone from the Fujimori’s party, comes and says, ‘If you don’t take that out, that article,  
253 don’t even count with our votes’. And then others from another party, who were supposedly my allies, ‘If you  
254 don’t take that out, there is no, there is no Law’. And I’m like ‘Wow, how much power!’” (Congress member  
255 2011-2016, POL-02).

256 **Table 5. Main conflictive issues among supporters and opponents of the nutritional warnings**

| Topic                                   | Arguments against                                                                                                                                                                                                                                                                                                                                                                                                                                                                                                                                                   | Arguments in favor                                                                                                                                                                                                                                                                                                                                                                                                                                                                                                                                                                                 | How it was resolved                                                                                                                                                                                                                                                                                                                                                                                                                                                                                                                    |
|-----------------------------------------|---------------------------------------------------------------------------------------------------------------------------------------------------------------------------------------------------------------------------------------------------------------------------------------------------------------------------------------------------------------------------------------------------------------------------------------------------------------------------------------------------------------------------------------------------------------------|----------------------------------------------------------------------------------------------------------------------------------------------------------------------------------------------------------------------------------------------------------------------------------------------------------------------------------------------------------------------------------------------------------------------------------------------------------------------------------------------------------------------------------------------------------------------------------------------------|----------------------------------------------------------------------------------------------------------------------------------------------------------------------------------------------------------------------------------------------------------------------------------------------------------------------------------------------------------------------------------------------------------------------------------------------------------------------------------------------------------------------------------------|
| <b>Include regulations to publicity</b> | <p><b>Design of the Law:</b></p> <ul style="list-style-type: none"> <li>- The law goes against international agreements and because of that they were going to impose sanctions on Peru.</li> <li>- Soccer games and the World Cup will not be broadcasted because they have processed food sponsors.</li> <li>- Regulations come with political and ideological overtones against companies.</li> <li>- Advertising companies have signed a self-regulation agreement.</li> <li>- The law is an encroachment on the media or is against media freedoms.</li> </ul> | <p><b>Design of the Law:</b></p> <ul style="list-style-type: none"> <li>- Overweight and obesity in children and adolescents must be addressed because it is a serious problem.</li> <li>- The law seeks to protect children and adolescents because they are a vulnerable population.</li> <li>- Foods that are harmful to health should not be advertised.</li> <li>- Advertising of ultra-processed foods influences children and adolescents to buy them.</li> <li>- The industry invests a lot of money in advertising ultra-processed foods, so the industry is against this law.</li> </ul> | <p><b>Design of the Law:</b></p> <ul style="list-style-type: none"> <li>- The ban on advertising unhealthy processed foods in family protection time (6 am to 10 pm) was removed.</li> <li>- Several articles were eliminated or modified (e.g. the prohibition to use animated characters in advertising was eliminated).</li> </ul>                                                                                                                                                                                                  |
|                                         | <b>Choice of nutritional warnings</b>                                                                                                                                                                                                                                                                                                                                                                                                                                                                                                                               | <p><b>Design of the Law:</b></p> <ul style="list-style-type: none"> <li>- It will have a negative impact on the economy and job losses in the food industry.</li> <li>- There is no scientific evidence that ultra-processed foods will make people sick or kill them.</li> <li>- The problem is not ultra-processed foods but eating habits.</li> <li>- There are no bad foods.</li> <li>- Nutritional warnings will be placed on typical Peruvian dishes.</li> </ul>                                                                                                                             | <p><b>Design of the Law:</b></p> <ul style="list-style-type: none"> <li>- Overweight and obesity in children and adolescents must be addressed because it is a serious problem.</li> <li>- The consumption of ultra-processed foods and chronic diseases have increased due to a poor diet in Peru.</li> <li>- We are not prohibiting the sale of any food but ensuring the availability of information to consumers.</li> <li>- Nutritional warnings will help the food industry to improve the quality of their products.</li> </ul> |
|                                         |                                                                                                                                                                                                                                                                                                                                                                                                                                                                                                                                                                     | <p><b>Design of the 2nd draft of the regulation:</b></p> <ul style="list-style-type: none"> <li>- The Law targets children and adolescents exclusively, so only</li> </ul>                                                                                                                                                                                                                                                                                                                                                                                                                         | <p><b>Design of the 2nd draft of the regulation:</b></p> <ul style="list-style-type: none"> <li>- The Regulation should expand the contents of the Law in</li> </ul>                                                                                                                                                                                                                                                                                                                                                                   |

medRxiv preprint doi: <https://doi.org/10.1101/2022.09.12.22279683>; this version posted September 15, 2022. The copyright holder for this preprint (which was not certified by peer review) is the author/funder, who has granted medRxiv a license to display the preprint in perpetuity. It is made available under a CC-BY-NC-ND 4.0 International license.

|                                                                                                                                                                                                                                                                                                                                                                                                                     |                                                                                                                                                                                                                                                                                                                                                           |                                                                                                                                                                                                                                                                                                                                                                                                                                                                                                          |
|---------------------------------------------------------------------------------------------------------------------------------------------------------------------------------------------------------------------------------------------------------------------------------------------------------------------------------------------------------------------------------------------------------------------|-----------------------------------------------------------------------------------------------------------------------------------------------------------------------------------------------------------------------------------------------------------------------------------------------------------------------------------------------------------|----------------------------------------------------------------------------------------------------------------------------------------------------------------------------------------------------------------------------------------------------------------------------------------------------------------------------------------------------------------------------------------------------------------------------------------------------------------------------------------------------------|
| <p>ultra-processed foods targeted for children and adolescents must have nutritional warnings</p> <ul style="list-style-type: none"> <li>- The Regulation cannot include the iconography of the nutritional warnings since the Regulation cannot restrict more than the Law and include contents that it did not specify.</li> <li>- Processed foods only represent 9.1% of Peruvians' food consumption.</li> </ul> | <p>order to achieve its objectives and purpose, which is to protect, warn and maintain a healthy diet</p> <ul style="list-style-type: none"> <li>- Scientific evidence shows that iconography helps to achieve the Law's goal.</li> <li>- The Regulation should apply to the entire population, but with emphasis on children and adolescents.</li> </ul> | <p>that: 1) The Regulation should have an emphasis on children and adolescents; and 2) The regulation cannot consider the size, color and iconography of the nutritional warnings.</p> <ul style="list-style-type: none"> <li>- The Ministry of Health prepares a regulation with emphasis on children and adolescents and does not regulate the iconography of nutritional warnings, but does leave a project where it indicates that for them, the nutritional warnings should be octagons.</li> </ul> |
|---------------------------------------------------------------------------------------------------------------------------------------------------------------------------------------------------------------------------------------------------------------------------------------------------------------------------------------------------------------------------------------------------------------------|-----------------------------------------------------------------------------------------------------------------------------------------------------------------------------------------------------------------------------------------------------------------------------------------------------------------------------------------------------------|----------------------------------------------------------------------------------------------------------------------------------------------------------------------------------------------------------------------------------------------------------------------------------------------------------------------------------------------------------------------------------------------------------------------------------------------------------------------------------------------------------|

**Design of the Nutritional Warnings Manual:**

- Octagons do not provide all the necessary information, so a combination of the GDA and the nutritional traffic light is better.
- Not providing all the information to the consumer and only displaying seals such as octagons was going to stultify the consumer.
- The congress proposal was to promote and disseminate the nutritional tables and the combination of the GDA-Traffic lights.
- The red octagon is an obstacle to trade.
- The food industry opposed placing "Ministry of Health" on the octagons.

**Design of the Nutritional Warnings Manual:**

- The octagon is easier for the consumer to understand and the congress proposal (GDA-Traffic lights) is very confusing.
- There is scientific evidence that the octagon is better than the traffic light.
- There were lobby for the traffic lights.

**Design of the Nutritional Warnings Manual:**

- President Vizcarra observes the Law approved by the congress to implement the GDA-Traffic Light, and this, together with social and media pressure, manages to stop the congressional attempt to modify the law.
- The congress does not continue with the discussion of the modifications, even though they were not in favor of the octagons, because it was already necessary to start implementing a Law regulating processed foods.
- The Ministry of Health approves the nutrition warnings manual with the black octagon nutrition warning and removes the text "Ministry of Health".

|                                                                                  |                                                                                                                                                                                                                                                                                                                                                                                                                                                                                            |                                                                                                                                                                                                                                                                                                                                                                                                                                                                                                                                                                                                                                                                                                                                                                                                                                                                                                                                                |                                                                                                                                                                                                                                                                                    |
|----------------------------------------------------------------------------------|--------------------------------------------------------------------------------------------------------------------------------------------------------------------------------------------------------------------------------------------------------------------------------------------------------------------------------------------------------------------------------------------------------------------------------------------------------------------------------------------|------------------------------------------------------------------------------------------------------------------------------------------------------------------------------------------------------------------------------------------------------------------------------------------------------------------------------------------------------------------------------------------------------------------------------------------------------------------------------------------------------------------------------------------------------------------------------------------------------------------------------------------------------------------------------------------------------------------------------------------------------------------------------------------------------------------------------------------------------------------------------------------------------------------------------------------------|------------------------------------------------------------------------------------------------------------------------------------------------------------------------------------------------------------------------------------------------------------------------------------|
|                                                                                  | <p><b>Design of the Law:</b></p> <ul style="list-style-type: none"> <li>- The technical parameters have no scientific evidence and are not in an official PAHO document.</li> </ul>                                                                                                                                                                                                                                                                                                        | <p><b>Design of the Law:</b></p> <ul style="list-style-type: none"> <li>- If the technical parameters are removed, it will take years to define them.</li> </ul>                                                                                                                                                                                                                                                                                                                                                                                                                                                                                                                                                                                                                                                                                                                                                                               | <p><b>Design of the Law:</b></p> <ul style="list-style-type: none"> <li>- The technical parameters of the Law are withdrawn so that they can be discussed in the Regulation.</li> <li>- The Law states that the Regulation should be based on WHO/PAHO recommendations.</li> </ul> |
| <p><b>Choice of technical parameters of sugar, sodium, and saturated fat</b></p> | <p><b>Design of the 1st draft of the regulation:</b></p> <ul style="list-style-type: none"> <li>- The technical parameters are not based on WHO/PAHO recommendations.</li> <li>- The technical parameters are not based on what is ideal for ultra-processed foods, but on what is already on the market.</li> <li>- The technical parameters are very restrictive and lack scientific evidence.</li> <li>- Processed foods only represent 9.1% of Peruvians' food consumption.</li> </ul> | <p><b>Design of the 1st draft of the regulation:</b></p> <ul style="list-style-type: none"> <li>- There is no scientific evidence or any official PAHO document that indicates the technical parameters, so technical parameters were created by a MoH team.</li> <li>- There was not an allocated budget to conduct studies that define the technical parameters.</li> <li>- Peru should not follow the tobacco route and instead, it should have an impartial position because the food industry is Peruvian and should not be harmed.</li> <li>- The proposed technical parameters seek to gradually improve ultra-processed products, aiming at the technical parameters to be proposed by WHO/PAHO in the future.</li> <li>- Drastic decreases in sugar or fat in ultra-processed foods could denaturalize some of these products.</li> <li>- These parameters aimed to gradually modify the social palatability of Peruvians.</li> </ul> | <p><b>Design of the 1st draft of the regulation:</b></p> <ul style="list-style-type: none"> <li>- This draft was severely criticized and was not approved.</li> </ul>                                                                                                              |
|                                                                                  | <p><b>Design of the 2nd draft of the regulation:</b></p> <ul style="list-style-type: none"> <li>- There is no scientific evidence that the parameters will be beneficial</li> <li>- The CODEX standards should be followed, since they do</li> </ul>                                                                                                                                                                                                                                       | <p><b>Design of the 2nd draft of the regulation:</b></p> <ul style="list-style-type: none"> <li>- The Regulation should include the parameters of PAHO (Nutrient Profile Model) because that was the indication in the Law</li> </ul>                                                                                                                                                                                                                                                                                                                                                                                                                                                                                                                                                                                                                                                                                                          | <p><b>Design of the 2nd draft of the regulation:</b></p> <ul style="list-style-type: none"> <li>- This draft was not approved.</li> </ul>                                                                                                                                          |

|                                                                                                                                                                                                                                                                                                                                                                                                                  |                                                                                                                                                                                                                                                                                                                                                                                                                                                                                                                                                                                                                                                                                                                                                                                                                               |                                                                                                                                                                                                                                                                                                   |
|------------------------------------------------------------------------------------------------------------------------------------------------------------------------------------------------------------------------------------------------------------------------------------------------------------------------------------------------------------------------------------------------------------------|-------------------------------------------------------------------------------------------------------------------------------------------------------------------------------------------------------------------------------------------------------------------------------------------------------------------------------------------------------------------------------------------------------------------------------------------------------------------------------------------------------------------------------------------------------------------------------------------------------------------------------------------------------------------------------------------------------------------------------------------------------------------------------------------------------------------------------|---------------------------------------------------------------------------------------------------------------------------------------------------------------------------------------------------------------------------------------------------------------------------------------------------|
| <p>have evidence.</p>                                                                                                                                                                                                                                                                                                                                                                                            | <p>- The implementation process could be gradual.</p>                                                                                                                                                                                                                                                                                                                                                                                                                                                                                                                                                                                                                                                                                                                                                                         |                                                                                                                                                                                                                                                                                                   |
| <p><b>Design of the approved regulation:</b></p> <ul style="list-style-type: none"> <li>- There is no scientific evidence that the PAHO technical parameters will be of benefit, so the CODEX standards, which do have scientific evidence, should be followed.</li> <li>- The industry offers to fund a study of the nutritional situation in Peru in order to develop its own technical parameters.</li> </ul> | <p><b>Design of the approved regulation:</b></p> <ul style="list-style-type: none"> <li>- The Regulation should include the parameters of PAHO (Nutrient Profile Model) because that was the indication in the Law.</li> </ul>                                                                                                                                                                                                                                                                                                                                                                                                                                                                                                                                                                                                | <p><b>Design of the approved regulation:</b></p> <ul style="list-style-type: none"> <li>- The Ministry of Health places the technical parameters of the Chilean regulation divided into 2 phases so that the Regulation can be approved by the Presidency of the Council of Ministers.</li> </ul> |
| <p><b>Approved Regulation:</b></p> <ul style="list-style-type: none"> <li>- The Law has been violated by approving a Regulation with technical parameters that were not those of WHO/PAHO and that were more flexible.</li> <li>- The College of Nutritionists of Peru files a lawsuit against the Ministry of Health requesting the annulment of the regulation.</li> </ul>                                     | <p><b>Approved Regulation:</b></p> <ul style="list-style-type: none"> <li>- The Regulation is legal because they followed the WHO recommendations that indicates that the MoH can include successful models, as is the case of the Chilean model.</li> <li>- The technical parameters of the Regulation are going to have the same amount of ultra-processed foods with nutritional warnings as with the PAHO Nutrient Profile Model.</li> <li>- The goal is to reach the technical parameters recommended by PAHO.</li> <li>- A Regulation is prepared with these parameters because it was the only way for it to be approved by the Presidency of the Council of Ministers.</li> <li>- The technical parameters are supported by the PAHO representative because he considered that this was the only solution.</li> </ul> | <p><b>Approved Regulation:</b></p> <ul style="list-style-type: none"> <li>- The College of Nutritionists of Peru had to give up its position against the Regulation because they preferred to continue with it rather than paralyze the process of implementing the Law.</li> </ul>               |
| <p><b>Relevance of the Design of the Law:</b></p>                                                                                                                                                                                                                                                                                                                                                                | <p><b>Design of the Law:</b></p>                                                                                                                                                                                                                                                                                                                                                                                                                                                                                                                                                                                                                                                                                                                                                                                              | <p><b>Design of the Law:</b></p>                                                                                                                                                                                                                                                                  |

|                                                                                         |                                                                                                                                                                                                                                                                                                                                                            |                                                                                                                                                                                                                                                                                                      |                                                                                                                                                                          |
|-----------------------------------------------------------------------------------------|------------------------------------------------------------------------------------------------------------------------------------------------------------------------------------------------------------------------------------------------------------------------------------------------------------------------------------------------------------|------------------------------------------------------------------------------------------------------------------------------------------------------------------------------------------------------------------------------------------------------------------------------------------------------|--------------------------------------------------------------------------------------------------------------------------------------------------------------------------|
| <p><b>other components of the Law (healthy canteens, nutrition education, etc.)</b></p> | <p>- The government is infringing the population's freedoms, it is going to tell parents what to buy.</p> <p>- The problem is not the diet but the lack of physical activity.</p> <p>- The problem in Peru is anemia, not obesity.</p> <p>- The Law does not focus on restaurants and fast food.</p> <p>- The solution is not to prohibit but educate.</p> | <p>- Overweight and obesity in children and adolescents must be addressed because it is a serious problem.</p> <p>- The Law is not prohibiting the sale of any food.</p> <p>- Children and adolescents are a vulnerable population.</p> <p>- This Law seeks to protect children and adolescents.</p> | <p>- Several articles of these components are eliminated or modified, such as the elimination of the supervision of nutritionists in the feeding of school children.</p> |
| <p>257</p>                                                                              | <p>The Table shows the main conflictive issues during the design and approval of the nutritional warnings' policy, as well as the arguments used by those in favor and against the policy</p>                                                                                                                                                              |                                                                                                                                                                                                                                                                                                      |                                                                                                                                                                          |
| <p>258</p>                                                                              | <p>and how these issues were finally solved. These conflictive issues were in regards to the regulations of publicity in the Law, the parameters during the Regulation's design, and the</p>                                                                                                                                                               |                                                                                                                                                                                                                                                                                                      |                                                                                                                                                                          |
| <p>259</p>                                                                              | <p>nutritional warnings' design during the Manual.</p>                                                                                                                                                                                                                                                                                                     |                                                                                                                                                                                                                                                                                                      |                                                                                                                                                                          |

260 **8.2. In 2017, the parameters for the nutritional warnings are finally defined in the Regulation of**  
261 **the Law 30021**

262 **8.2.1. Summary of how the Regulation was designed and approved**

263 Contrary to the expectation of having the Law's Regulation in July 2013, it was finally approved four years  
264 later, in June 2017 (13). During these years, the MoH pre-published two Regulation drafts (38, 69) with  
265 different parameters for sugar, salt, and saturated fat in each, as shown in Table 4. Informants explained  
266 that these drafts had to be pre-published for 90 days to receive opinions from private and public  
267 institutions before its official approval. According to our interviewees, for each draft, the MoH assigned  
268 two working groups to design the Regulation. The sectoral working group, composed only by the MoH, in  
269 charge of defining the nutritional warnings' parameters; and the multisectoral working group, composed  
270 by representatives from different ministries and Indecopi, to design the Regulation for all the Law.

271 In this same period, some congressmen against the Law proposed bills to modify the Law. Two bills were  
272 presented in 2015 (32, 34) and two others in 2017 (44, 45). In 2016, Peru had national elections and a  
273 new President and Congress were elected. In this new Congress, the main opposing party to the Law had  
274 majority of congressmen, which eased the discussion of the proposed bills to modify the Law. Informants  
275 from the MoH commented on the pressure and challenging atmosphere of having to design the  
276 Regulation while having the Congress attempting to change the Law. Also in these years, civil society  
277 organizations led protest marches and were in news programs to demand the implementation of the Law  
278 (37). Our informants believed that thanks to these marches, campaigns, and interviews, the Law achieved  
279 public awareness and pressed the MoH to accelerate their work.

280 In June 2017, a large Peruvian company of dairy products was sanctioned by the government of Panama  
281 for advertising a product named "Pura Vida" as milk when it was a dairy mix (a beverage made of milk  
282 and vegetable products) (70). This case received great media coverage, which proponents of the Law  
283 used as an opportunity to advocate for the Regulation's approval arguing that consumers should be  
284 properly informed about what they are eating, which was the purpose of the nutritional warnings. Civil  
285 society organizations led protests and made media appearances, pressing the new government to



286 approve the Regulation (57). On June 15<sup>th</sup>, 2017, two weeks after the “Pura Vida” scandal, the Regulation  
287 was finally approved.

288 “Without “Pura Vida” we would not have a Regulation. I am completely sure of that.” (Decisionmaker at the  
289 MoH, DEC-07)

290 The approved Regulation used the parameters of Chile and commissioned the MoH to design a Manual  
291 with the technical characteristics of the nutritional warnings and to approve it by Supreme Decree in no  
292 more than 120 days.

### 293 **8.2.2. Definition of the nutritional warnings’ parameters in the period of designing the** 294 **Regulation**

295 Once the Law was approved, the MoH oversaw the design of its Regulation. During all these years, the  
296 food industry proposed the daily reference values defined by the CODEX Alimentarius (72), which is a set  
297 of guidelines and standards approved by WHO. The MoH, however, did not recommend their use for  
298 being based on the nutritional requirements of adults and not children or adolescents, and proposed  
299 different parameters along the years.

300 As shown in Table 4, by 2014 the only available source for parameters were the ones proposed in the  
301 PAHO’s expert consultation, which were already rejected by those in favor and against the Law for being  
302 opinions and not based on scientific evidence. Thereby, the MoH pre-published a Regulation’s draft with  
303 parameters for sugar, sodium, and fat, based on an existing database of 400 processed foods and  
304 beverages collected in July 2013 (69). This draft, however, was strongly criticized for using parameters  
305 too flexible and for not being based on the WHO/PAHO recommendations, as indicated in the Law.

306 “Someone who criticized this Regulation a lot was Manuel Peña [former PAHO representative]. He created a  
307 strong pressure when he said in the media that this Regulation was not the one that was [proposed] in the  
308 Law, that the values [of this draft] were not the ones specified in the Law” (Decision maker at the MoH, DEC-  
309 01)

310 In 2015, and with a new minister of health, the MoH held several meetings with PAHO in Peru and  
311 officially asked for their parameters. Our informants commented that PAHO replied by sending the

312 parameters from the PAHO's expert consultation of 2011, which was used as evidence by the sectoral  
313 commission to publish a Regulation's draft with these parameters (33), in an attempt to cut off  
314 discussions at the multisectoral working group that might have led to the adoption of less stringent  
315 parameters.

316 "We could not issue a new version of the Regulation if it was not done in a multisectoral working group, and  
317 that would have taken a long time. So, we decided that the MoH defines the parameters, which were the  
318 most critical point (...) (and) The other things, (for example) the label's design or the timeframe, all that, was  
319 part of the Regulation. But the value would not be in dispute. So, what was avoided was the negotiation of  
320 parameters. They would be already established." (Decision maker at the MoH, DEC-01)

321 Some months later, Chile issued its own parameters for their nutritional warnings (36), which were more  
322 flexible than those of the expert consultation but more stringent than those proposed in Peru in 2014  
323 (Table 4). In February 2016, WHO and PAHO published the Nutrient Profile Model (35, 41), which were  
324 much stricter than all the previous ones. In face of this new evidence, the MoH replaced its Regulation's  
325 draft of 2015 and used the parameters of the Nutrient Profile Model for the second draft, pre-published on  
326 July 25<sup>th</sup>, 2016, (38) days before President Humala finished his ruling period (28<sup>th</sup> July, 2016).

327 The parameters for trans-fat were published separately, on July 26<sup>th</sup>, 2016 (39), as they were prepared by  
328 a different MoH group who had already defined them in 2012 (71). The trans-fat pre-publication  
329 established their elimination in any processed product using partial hydrogenation after 54 months.  
330 Interviewees from different sectors agreed that even though the food industry questioned that zero trans-  
331 fat would not be technically feasible, they were mainly in favor of the initiative, possibly explaining why  
332 these parameters were easy to approve and are still in force.

333 "Trans-fats were easier, right? Because in trans-fat there is a consensus that it has to be zero." (Decision  
334 maker at the MoH, DEC-01)

335 The new government's MoH, under the presidency of Kuczynski (2016-2018), received several queries,  
336 suggestions, and critiques for the second Regulation's draft. The MoH hired a group of consultants to  
337 attend these comments and prepare a new Regulation. The parameters (based on the WHO/PAHO

338 Nutrient Profile Model) were one of the main conflictive issues among the Presidency of the Council of  
339 Ministers (PCM), who had to approve the Regulation (Table 5).

340 “The minister [of Health] returned several times with the Regulation in hand saying: ‘No, no, this does not  
341 pass in the PCM. The minister of Industry, the prime minister, they don’t want, they say no.’” (International  
342 organization’s representative, INT-01)

343 After the “Pura Vida” scandal, and aiming to overcome the PCM’s resistance, the MoH adopted the  
344 Chilean parameters and the Regulation was rapidly approved, in June 2017, two weeks after the scandal.  
345 As seen in Table 5, civil society organizations initially rejected this approved Regulation for not using the  
346 WHO/PAHO parameters, but then they accepted them and decided to advocate for the Manual’s design.

347 “We reached a tacit agreement of accepting the Regulation with the parameters of Chile, right? Because we  
348 met at the College [of nutritionists] and we said: ‘If we fight the parameters of PAHO, this [the Regulation]  
349 will take even more time’; and, the fact that it takes longer, is going to imply that the other side – those  
350 against The Healthy Eating Law – would take advantage of it to create this kind of poorly made laws.” (Civil  
351 society organization’s representative, SOC-03)

### 352 **8.2.3. Proposed nutritional warnings in the period of designing the Regulation**

353 None of the Regulation’s drafts specified a design for the nutritional warnings. According to our  
354 interviewees, during 2014 and 2015 advocates proposed the traffic lights design, which were the most  
355 well-known design at the time. However, based on the Ecuadorian experience, they discarded this design  
356 because it was not clear for consumers to decide which product was better and because it enabled the  
357 food industry to take advantage of their colors to merge them into colorful labels.

358 “And we also had evidence that the other alternatives, like the traffic lights, were absolutely distracting and that  
359 they didn’t go to the essence of the problem. Let’s say, if we have a product with two orange balls, one green  
360 ball, and two red balls, who won? What is your conclusion? I mean, the interpretation is complex. And that was  
361 clear in Ecuador which was the first [country] to use this design.” (International organization’s representative,  
362 INT-01)

363 During 2015 onwards, the octagons design gained more support among advocates of the Law. Chile  
364 showed positive results in helping consumers decide (72) and not having severe effects in the food

365 industry's employment (73). Likewise, the Peruvian MoH conducted small studies using focus groups in  
366 different cities and found positive results with the octagons (14). Informants mentioned that the MoH tried  
367 to specify the octagons as the selected design for the nutritional warnings in the draft published in 2016.  
368 However, opponents at the PCM (e.g., MEF) argued that the Law did not mention using iconography for  
369 the warnings, so that the design should not be written. As shown in Table 5, to solve this disagreement,  
370 the Ministry of Justice was called to play as neutral party to decide, and it failed in favor of the opponents,  
371 which is why the published draft did not mention any specific design.

372 Throughout these years, opponents from the food industry and Congress were against the octagons and  
373 proposed the traffic lights or Guideline Daily Amounts (GDA) designs.

#### 374 **8.2.4. Main challenges faced when trying to establish the nutritional warnings' parameters** 375 **in the Regulation**

376 Main challenges during this period were: 1) the absence of parameters issued by WHO/PAHO until 2016,  
377 three years after the Law's approval; 2) the strong opposition of the food industry, media, congressmen,  
378 and members of the PCM (e.g. Ministry of Economy, Ministry of Production) to the different parameters  
379 and nutritional warnings' design proposed by the MoH; 3) the scarcity of local research to support the  
380 MoH's decisions, mainly due to lack of funding and no alliances with researchers; 4) power asymmetries  
381 between those in favor and against (i.e., the food industry had plenty of resources to pay several lawyers  
382 to confront the Regulation's drafts, whereas the MoH only had a small legal team involved in several  
383 other policies); and finally, 5) political will to assure the Regulation's approval. In this regard, some  
384 interviewees mentioned that the former president Humala (2011-2016) supported the approval of the  
385 Law, but there was less consensus regarding his support to the Regulation:

386 "When [Humala's] government was finishing, President Humala questioned why if the Law begun in his  
387 period, the Regulation was not yet in place? He was also questioned about it. So, he said: 'I want the  
388 Regulation now.'" (Decision maker at the MoH, DEC-01)

389 "It's perfectly known that the Law was approved, and President Humala turned around. He turned his back  
390 on it and did not want to move anything at all." (International organization's representative, INT-01)

391 **8.3. In 2018, the Nutritional Warnings Manual is approved, defining the octagons as the**  
392 **selected design**

393 **8.3.1. Summary of how the Manual was designed and approved**

394 The MoH, in charge of designing the Manual, pre-published a first draft in August 2017, two months after  
395 the Regulation's approval (48). The draft received several comments and queries, especially from the  
396 food industry, so the MoH assigned three persons to attend the comments aiming to approve it by  
397 November 2017. However, in September 2017, the Minister of Health was removed, and the next two  
398 ministers, ruling since September 2017 to April 2018, did not prioritize this policy.

399 "You know how many times I have been told to put away the Manual? 'Save your Manual, that's never going  
400 to come out. Save it'. Then another [minister] came, another, another minister, and another director. And I  
401 took [the Manual] out again! (Laughs). People told me: 'Don't bother, it won't have a chance, I don't know  
402 why you're insisting (...)' And I looked for an audience to tell what the warning's Manual was, yeah, until one  
403 [Minister] finally listened to me" (Decision maker at the MoH, DEC-04)

404 On the other hand, the new Congress, elected in July 2016 and with 60% of its congressmen from *Fuerza*  
405 *Popular*, the main opponent political party in the previous parliament, continued discussing bills to modify  
406 the Law and its Regulation. This was a very algid period for the policy, in which the MoH did not work on  
407 the Manual, and the Congress had enough votes to modify the Law and the warnings' design. For  
408 instance, they proposed changing the octagons to traffic lights or GDA and replacing the nutritional  
409 warnings for nutritional tables at the back of the package. As shown in Table 3, six bills from different  
410 parties were prepared during 2017 (44-47, 49, 50) and then merged into one single document (Dictum).  
411 With majority of votes from *Fuerza Popular*, the Dictum was approved by the Congress on March 9<sup>th</sup>,  
412 2018, and sent to the country President, Kuczynski, to either approve or veto the Dictum until April 9<sup>th</sup>,  
413 2018.

414 On March 21<sup>st</sup>, however, a political crisis led President Kuczynski to his resignation (62), without having  
415 replied to the Dictum. On March 23<sup>rd</sup>, 2018, his vice-president, Vizcarra, assumed the presidency and  
416 days later he vetoed the Dictum, arguing that the MoH considered the octagons easier to understand and

417 that the parameters proposed by the Congress (GDA) were based on a diet for an adult person (2000  
418 kcal) and not children or adolescents (74).

419 “[President] Vizcarra arrived and the first thing he heard was: ‘Sir, observe the Law’. And I’m sometimes  
420 pessimistic. I said: ‘How’s this man going to observe the Law, he’s just coming in, he doesn’t even know  
421 what it is, ahh, no, he is going to promulgate it, he won’t fight with the congressmen’. But [fortunately] he  
422 observed the Law!” (Civil society organization’s representative, SOC-01)

423 With President Vizcarra, the new minister of health resumed the Manual’s draft pre-published in 2017 and  
424 encouraged its approval. Meanwhile, the Congress continued preparing a new document to respond to  
425 the veto of President Vizcarra; however, and against all odds, they stopped their efforts, and the Manual  
426 was finally approved in June 2018 (14). Some informants believed that the Congress did not continue  
427 because *Fuerza Popular*, the main opponent political party was under public scrutiny and lost credibility  
428 due to denounces of corruption (75).

429 “They [Fuerza Popular] cut off arms and legs to the Law, [but now] they wanted to implement their colored  
430 GDA. And they had the votes to do it. And [you can] remember that the president observed it [the Dictum].  
431 That draft returned [to the Congress], and they [Fuerza Popular] had the votes to insist. If they would have  
432 insisted on [modifying] the Law, this would be history, we would not be talking about this right now.”  
433 (Congress member 2011-2016, POL-02)

434 Other interviewees argued that the confrontation between the MoH and the Congress reached the public  
435 opinion, and a dichotomy of health vs economy was created, where “the powerful food industry” was seen  
436 as only seeking to profit disregarding people’s health. Others added that a popular doctor who had a  
437 program in the biggest radio station (Dr. Elmer Huerta) was a key advocate to easily explain to the public  
438 the evidence supporting the octagons and to highlight the economic interests behind the proposals from  
439 the Congress. PAHO and civil society organizations were also strong supporters of the octagons.

440 “Something that worked very well was having Elmer Huerta as a champion, right? (...) He [normally] tries to  
441 be fairly impartial on political issues; but, on this one, he wasn’t. And he was very clear in pointing out who  
442 were against the Law.” (Independent researcher, INV-03)

443 Once the Manual was approved, the nutritional warnings' first implementation's phase begun one year  
444 later, on June 17<sup>th</sup>, 2019; and its second phase, on September 17<sup>th</sup>, 2021.

### 445 **8.3.2. Proposed nutritional warnings in the period of designing the Manual**

446 During these years, the nutritional warnings design was the main conflictive issue. Those in favor of the  
447 Law advocated for the octagons, arguing that they were easy to understand, and clearly enough to make  
448 rapid decisions (76). Opponents, on the contrary, proposed the traffic lights, GDA or a mix of both,  
449 arguing that consumers needed more information (i.e., quantity of nutrients) than solely short messages.

450 "We ruled based on what the consumer law establishes, that a consumer must have all the appropriate  
451 information for decision making. So, that's why we went for a mixed figure between the tables of nutritional  
452 values (...) and combine it with colors, or messages to inform if the minimum allowed was exceeded,  
453 according to the table established by the Ministry of Health." (Congress member, 2016-2018, POL-03)

454 Based on qualitative studies conducted by the MoH, but mainly due to discussions at the PCM, the  
455 octagons' design changed from the draft published in August 2017 to the Manual approved in June 2018.  
456 For instance, their colors changed from red to black, the label "Ministry of Health", which was inside the  
457 red octagon, was removed from the warning, and the minimum package's size that could be labelled  
458 changed from 20 cm<sup>2</sup> to 50 cm<sup>2</sup> (14).

459 "The warnings' Manual is basically about technical aspects, but there were also negotiations. No, no, they  
460 didn't call it 'negotiations' but 'decisions' at the Senior Management [PCM], more political, let's say, right? In  
461 other words, not everything was finally solved by the technical team. The technical team had a position, but  
462 the ultimate decision was at the Senior Management level" (Decision maker at the MoH, DEC-04)

### 463 **8.3.3. Main challenges faced when trying to establish the nutritional warnings' design in** 464 **the Manual**

465 Main challenges in this period were 1) the strong power of the opponents at the Congress-level, risking  
466 the nutritional warnings policy; 2) the strong opposition to the octagons design at the PCM, leading to  
467 delays in the Manual's approval and changes to the MoH's proposed design; 3) the scarce political will of  
468 two health ministers to continue working on the Manual (Sept 2017 – Apr 2018); 4) political instability,  
469 which led to changes of the country President; 5) the limited locally-generated research to inform the

470 MoH's decisions regarding the warnings' parameters and design, which was used by opponents as an  
471 argument to delegitimize the data from other countries that the MoH presented as evidence.

## 472 **9. Why this policy was approved: Analysis using the Kaleidoscope Model**

473 Following the Kaleidoscope Model (11), we conclude that the nutritional warnings *Reached the policy*  
474 *agenda* because the three main hypotheses were fulfilled. First, the nutritional warnings were part of a  
475 Law that targeted a relevant problem based on credible evidence and popular perception (Hypothesis 1).  
476 Unhealthy eating decisions among children and adolescents was unanimously seen as a relevant  
477 problem. Although opponents initially argued that the Law should focus on malnutrition and anemia rather  
478 than overweight and obesity, the Law's aim of protecting children was strong enough to discourage more  
479 direct opposition. Likewise, even though during the Law's design, opponents were against regulating  
480 publicity, which included the nutritional warnings' aim of informing the population about processed food's  
481 content, their narrative shifted later, when they no longer questioned this aim and instead focused on the  
482 "appropriate" warnings' design.

483 Second, we identified well-defined focusing events (Hypothesis 2) that not only positioned the nutritional  
484 warnings in the policy agenda but helped it regain importance throughout the years. For example, the  
485 "expert consultation" organized by PAHO in 2011, where an initial set of parameters were proposed; the  
486 "Pura Vida" scandal in 2017, where supporters took the opportunity to reposition the Law and advocate  
487 for its Regulation; having the support of key health ministers who pursued the policy approval, despite  
488 oppositions at the Congress and PCM; having the Chilean experience of using octagons with promising  
489 results; and the political context during the Manual's approval that reduced its opposition.

490 And third, there were strong individuals and institutions who supported the policy (Hypothesis 3) and were  
491 necessary along the years to maintain the policy's position. Advocates came from diverse backgrounds,  
492 but mainly from the Congress, civil society organizations and PAHO. Importantly, having the support of  
493 most health ministers helped those at the MoH to continue working on the Regulation and Manual.  
494 Proponents from different backgrounds successfully joint together to push the policy, such as the MoH  
495 having close collaboration and technical guidance from PAHO; the alliance of many civil society  
496 organizations in a larger platform ("Healthy Eating Platform"); or maintaining key legal and technical



497 personnel in the MoH working on the policy drafts, who gave continuity when ministers changed. Worth  
498 noting, even though supporters had some important discrepancies (See Table 5), they later agreed on  
499 joining efforts and move the policy forward.

500 Regarding the policy *Design*, in which the nutritional warnings' design and parameters were defined, were  
501 possibly made mainly due to effective cost-benefit calculations (Hypothesis 6), in which advocates  
502 assessed their potential gains and losses with each design, as well as their own power and resources. In  
503 our case, the different proposed designs lead to several negotiations during the Regulation's and  
504 Manual's approval, yielding elements that weaken the regulations, but that ultimately allowed them to be  
505 approved. Importantly, the nutritional warnings' purpose was to bring health gains at the population level  
506 (i.e., use of services' savings, DALYs), especially for children and adolescents, which was used as a cost-  
507 effective argument to its approval.

508 On the contrary, the hypothesis of evidence and research as a key component to design a policy  
509 (Hypothesis 4) was the weakest one in this policy. One of the main limitations found throughout the  
510 process was the little evidence to back the proponents' decisions about the parameters or warnings'  
511 design, as well as the absence of alliances with researchers to generate local evidence or support the  
512 research efforts of advocates. Most studies were small-scale only and conducted by reduced groups at  
513 the MoH or civil society organizations (Table 3). Moreover, Peruvian entities did not allocate budget to  
514 support the conduction of robust studies to accompany this policy process.

515 Additionally, we found that the ideas and believes (Hypothesis 5) behind each key document along the  
516 process (e.g., among different Regulations' drafts) substantially differed. For instance, the ideas of the  
517 first Regulation's draft's team were not acting against the food industry nor establishing parameters far  
518 different from the ones in the market; whereas the second Regulation's draft team's ideas were to legally  
519 back all their decisions due to the strong opposition faced from the food industry. Ideas and believes were  
520 also important in defining the warnings' design, since advocates proposed the octagons, which have  
521 proven to be easy to read and understand (77), and better than other designs in helping consumers to  
522 choose the healthiest option among different products (78); in contrast to the traffic lights design, which  
523 misleadingly could favor a product high in a critic nutrient as healthy (77, 79).

524 Finally, for the *Adoption* stage, the three hypotheses of the model were found relevant for the policy  
525 approval. Government veto players (Hypothesis 8), such as Presidents and Health Ministers, were either  
526 in favor or neutral to the policy, but never against it, which enabled its continuation. However, powerful  
527 veto players at the Congress and within the PCM, related to the economic interests of the food industry,  
528 jeopardized the policy several times by trying to modify the Law or not approving the Regulation and  
529 Manual, especially during the political instability of 2016-2018. Even though neither the food industry nor  
530 civil society organizations had direct veto power, they were able to influence the policy process by press  
531 releases or media interviews, where they exposed their opinions and critics; or even by influencing  
532 decisions of congressmen and ministers. Worth noting, since this policy took several years, stakeholders  
533 changed along the years and some of them had greater interest and influence than others, as seen  
534 during the Manual's period, where two Health Ministers did not make any efforts to move the policy  
535 forward. Others changed their stands, from being in favor to opposing, such as some congressmen  
536 during the approval of the Law.

537 Despite large disparities between opponents' economic capacity in contrast to the scarce resources of the  
538 proponents, government stakeholders, such as Presidents and Health Ministries, had greater power than  
539 the food industry in terms of regulatory decisions (Hypothesis 7), since they were the ones in charge of  
540 designing the policy documents and ultimately, approving them. Importantly, this policy received public  
541 attention at different time points, which might have increased the power of proponents. For instance, the  
542 advocacy role played by a popular doctor in a radio station during the Manual's approval helped raising  
543 the discussion to the public opinion, allowing proponents to gain more support. Lastly, even though  
544 supporters not always waited for propitious timings (Hypothesis 9) and generally had to wait for the long  
545 processes of negotiation or the existing calendars at the Congress and Ministers to position the policy,  
546 they did take advantage of some opportunities. The "Pura Vida" scandal is the most salient one, in which  
547 an international event received local attention and was used to advocate for the Regulation's approval.

#### 548 **IV. Discussion**

549 This study describes, over the 2012-2018 period, the milestones and key stakeholders' roles and stances  
550 during the Peruvian nutritional warnings policy design and approval, and analyzes the policy drivers that

551 made it possible. The main milestones identified are the approvals of the three main policy documents:  
552 The Law 30021, its Regulation, and the Nutritional Warnings Manual. We found that the nutritional  
553 warnings were incorporated as part of the Law 30021, approved in 2013, after facing strong opposition  
554 from the media and food industry representatives and some congressmen. The nutritional warning  
555 parameters were differed to a further Regulation, which after four years and two policy drafts, was finally  
556 approved in 2017, soon after a mediatic scandal on a dairy product. This Regulation demanded a Manual  
557 to define the technical characteristics of the warnings, which after disagreements at the PCM and a  
558 parallel process of bills to modify the Law and its Regulation in the Congress, was approved in 2018. This  
559 Manual defined the black octagons as the warnings design and two implementation phases (June 2019  
560 and September 2021) with different thresholds. Some relevant changes throughout this process were  
561 using more flexible parameters and taking out some specifications of the octagons, such as the label  
562 “Ministry of Health” or their use in small products. During this process, civil society organizations and  
563 PAHO were strong advocates for the policy.

564 Regarding key stakeholders’ roles and stances, we found that they came from different sectors and  
565 played relevant roles in favor or against the nutritional warnings policy along the years. The main  
566 opponent throughout the process was the food industry, which has proven to be a major opponent  
567 towards nutritional warnings policy in Latin American countries, such as Chile (80), Uruguay (7), Colombia  
568 (81, 82), and Brazil (83). The industry arguments in Peru were similar to those used in other countries  
569 when pursuing their nutritional warnings policies. For instance, critiques towards the evidence used by the  
570 promoters to support the parameters and warnings’ design, arguing that it was too weak (7), that the food  
571 industry’s proposals were not included (83), or that this policy did not showed reductions in obesity in  
572 other countries (82). Another common argument was the economic lost that the warnings’ implementation  
573 would bring to their countries, such as loss of jobs (7, 80, 83), rise of prices (7), or violations to  
574 international trade agreements (80, 83). None of these situations, however, occurred in the countries that  
575 have implemented the octagons (80). Importantly, beyond their arguments, we found that some powerful  
576 stakeholders were aligned to the food industry stance and acted against the warnings policy, such as  
577 congressmen and policymakers’ at ministries of economic sectors, as seen in Uruguay (7), Chile (80),  
578 and Colombia (82), which risked its approval and further implementation.

579 On the other hand, civil society organizations were vital to advocate for this policy by doing public  
580 appearances in TV and radio to inform about the policy and demanding its rapid approval and  
581 implementation. Similar to Colombia, these organizations promoted the bill to approve the nutritional  
582 warnings and the prohibition of foods with FoP labels to children and adolescents (82). Nonetheless, in  
583 Colombia, some health ministers were aligned with the food industry and against the policy (82); in clear  
584 contrast to Peru, where most health ministers were in favor of the policy, enabling its maintenance in the  
585 policy agenda and further approval. One important difference between Peru and other countries, such as  
586 Chile (84), Mexico (10), and Uruguay (7), have been the role of researchers and use of evidence to back  
587 the decisions of promoters. Whereas in Peru one of the main challenges across the years was the limited  
588 participation of researchers in the generation of local and tailored evidence, in other countries academics  
589 worked closely with policymakers and civil society organizations, supporting their arguments against  
590 opponents, and thereby easing the approval of their policies. Importantly, this reflection arises within a  
591 context and a policy environment where local support to science in the country is generally limited and, no  
592 less important, the spaces to promote the generation of local evidence to inform policies requires active  
593 promotion. These findings are important to anticipate in other settings where similar policies are yet to be  
594 pursued and where simultaneous support to the generation of local evidence will be essential to protect  
595 and progress with related whole of society prevention approaches.

596 Finally, another relevant finding is that beyond the technical contents needed to define the parameters  
597 and warnings' design, the policy process of the nutritional warnings highly depended on political issues,  
598 such as the political will of key decision makers at the Congress and PCM and the political stability in the  
599 country. Indeed, the power of the opposition and their strong influence in the decisions made,  
600 continuously changed the policy contents and, potentially, their intended results. Thereby, this policy  
601 exemplifies the relevance of the political context during the design and approval of a health policy, which  
602 is usually ignored in academic studies (85).

## 603 **10.Strengths and limitations**

604 This study conveys the experiences of diverse and key supporters and opponents involved in the design  
605 and approval of the nutritional warnings' policy in Peru, which allows to gain a deeper insight of how this

606 process was and triangulate their different perspectives into a solid analysis. Likewise, having included  
607 the most relevant policy documentation and news about the nutritional warnings' design and approval in  
608 our study enabled a better contextualization and analysis of our interviewees discourses. One limitation is  
609 that the elapsed time between the policy design and the interviewees, could potentially lead to a recall  
610 bias. However, their discourses were triangulated with other informants as well as with the policy  
611 documents and news.

## 612 **11.Conclusion**

613 This study presents the design process of the Nutritional Warnings policy in Peru, which was defined  
614 through three main documents: The Law 30021 (2013), its Regulation (2017), and the Nutritional  
615 Warnings Manual (2018). The stances of some stakeholders changed along the years, but in general, it  
616 was mainly supported by some congressmen, policymakers, civil society organizations, and PAHO; and  
617 usually opposed by the food industry and media representatives, as well as some civil society  
618 organizations and policymakers from the economic sector. The parameters and the warnings' designs  
619 changed frequently across the years, with different proposals in each draft, mainly due to unclear  
620 evidence on which parameters and designs would be the best and difficulties to reach agreement among  
621 supporters and opponents. These changes led to important loses, such as using parameters more flexible  
622 than those proposed by PAHO or not using the octagons in small labels, however, they were also  
623 necessary negotiations to allow the approval of the policy.

624 Finally, based on the Kaleidoscope Model, we identified that the policy reached the political agenda  
625 because the problem it targeted (overweight and obesity in children and adolescents) proved to be  
626 relevant and secured the backing from powerful advocates within and outside the government, who took  
627 advantage of local and international focusing events to reposition the main policy documents at different  
628 stages. However, important weaknesses during the design were identified, especially the absence of  
629 official parameters and local studies to back decisions. Importantly, final versions of the documents were  
630 able to be shaped due to negotiations held by supporters, who considered the costs and benefits of their  
631 decisions and allowed editions that weakened the documents but enabled their completion. Even though  
632 the policy took several years before its implementation, it was ultimately adopted because government

633 veto players (e.g., Health ministers, PCM) were mostly in favor of the policy, and despite having some  
634 relevant opposing players (e.g., Congressmen, PCM), the power of supporters proved to be stronger than  
635 that of their opponents. Acknowledging that the nutritional warnings policy has being implemented in  
636 different Latin American countries, these results will be useful for advocates to learn from the experience  
637 of Peru and anticipate potential difficulties and ways to overcome them.

## 638 References

- 639 1. Popkin BM, Reardon T. Obesity and the food system transformation in Latin America. *Obesity*  
640 *Reviews*. 2018;19(8):1028-64.
- 641 2. Antiporta D, Miranda JJ. Ley de promoción de alimentación saludable: ¿jugando a la política con  
642 la salud de los niños? *Revista Peruana de Medicina Experimental y Salud Publica*. 2015;32:603-.
- 643 3. Organización Panamericana de la Salud. El etiquetado frontal como instrumento de política para  
644 prevenir enfermedades no transmisibles en la Región de las Américas. Washington, D.C: PAHO; 2020.
- 645 4. Instituto Nacional de Salud. Tendencia del sobrepeso y obesidad en niñas y niños de 5 a 9 años.  
646 INS; 2019.
- 647 5. Ley N° 30021. Ley de promoción de la alimentación saludable para niños, niñas y adolescentes,  
648 Ley N° 30021 (2013).
- 649 6. Villalobos Dintrans P, Rodriguez L, Clingham-David J, Pizarro T. Implementing a Food Labeling  
650 and Marketing Law in Chile. *Health Systems & Reform*. 2020;6(1):e1753159.
- 651 7. Ares G, Antúnez L, Cabrera M, Thow AM. Analysis of the policy process for the implementation  
652 of nutritional warning labels in Uruguay. *Public Health Nutrition*. 2021;24(17):5927-40.
- 653 8. Corvalán C. Evaluating new Chilean National Regulations on the Food Supply. Institute of  
654 Nutrition and Food Technology. Santiago: University of Chile, Santiago, Chile; Universidad Diego  
655 Portales, Santiago, Chile; University of North Carolina, USA; 2019.
- 656 9. James E, Lajous M, Reich MR. The Politics of Taxes for Health: An Analysis of the Passage of the  
657 Sugar-Sweetened Beverage Tax in Mexico. *Health Systems & Reform*. 2020;6(1):e1669122.
- 658 10. White M, Barquera S. Mexico Adopts Food Warning Labels, Why Now? *Health Systems &*  
659 *Reform*. 2020;6(1):e1752063.
- 660 11. Resnick D, Babu, S. C., Haggblade, S., Hendriks, S., & Mather, D. . Conceptualizing drivers of  
661 policy change in agriculture, nutrition, and food security: The kaleidoscope model. Washington DC: FPRI  
662 Discussion Paper. InternationalFood Policy Research Institute; 2015.
- 663 12. Haggblade S, Babu S. A user's guide to the Kaleidoscope Model: Practical tools for understanding  
664 policy change 2017.
- 665 13. Decreto Supremo que aprueba el Reglamento de la Ley N° 30021, Ley de Promoción de la  
666 Alimentación Saludable, Decreto Supremo N° 017-2017-SA (2017).
- 667 14. Aprueban Manual de Advertencias Publicitarias en el marco de lo establecido en la Ley N°  
668 30021, Ley de promoción de la alimentación saludable para niños, niñas y adolescentes, y su  
669 Reglamento aprobado por Decreto Supremo N° 017-2017-SA, Decreto Supremo N° 012-2018-SA (2018).
- 670 15. Bengtsson M. How to plan and perform a qualitative study using content analysis. *NursingPlus*  
671 *Open*. 2016;2:8-14.
- 672 16. Congreso de la República. Periodo Parlamentario 2011-2016. Sesión de instalación de la Junta  
673 Preparatoria 2011.
- 674 17. Organización Panamericana de la Salud. Recomendaciones de la Consulta de Expertos de la  
675 Organización Panamericana de la Salud sobre la promoción y publicidad de alimentos y bebidas no  
676 alcohólicas dirigida a los niños en la Región de las Américas. . Washington, DC: OPS; 2011.
- 677 18. Ollanta Humala Tasso asume presidencia de la República [press release]. 2011.
- 678 19. Foro Salud Perú. V Conferencia Nacional de Salud 17-11-11 (1ra parte). 2011.
- 679 20. Foro Salud. Declaración de la V Conferencia Nacional de Salud. Reforma del Estado en Salud, un  
680 imperativo ético y moral de inclusión social. V Conferencia Nacional de Salud; Peru2011.
- 681 21. Proyecto de Ley 430/2011-CR, (2011).
- 682 22. Proyecto de Ley 775/2011-CR, (2011).
- 683 23. Proyecto de Ley 1038/2011-CR, (2011).

- 684 24. Midori De Habich asumió cargo como nueva Ministra de Salud [press release]. 2012.
- 685 25. Consejo Consultivo de Radio y Televisión CONCORTV. Análisis de la publicidad de alimentos no  
686 saludables en la televisión peruana. Lima: CONCORTV; 2012.
- 687 26. LEY 20606 sobre composición nutricional de los alimentos y su publicidad. , (2012).
- 688 27. Aprueban el Reglamento que establece los parámetros técnicos sobre los alimentos y bebidas  
689 no alcohólicas procesados referente al alto contenido de azúcar, sodio y grasas saturadas y de la  
690 reducción gradual de grasas trans, Resolución Ministerial N° 321-2014/MINSA (2014).
- 691 28. Nombrar Ministro de Estado en el Despacho de Salud, al señor Aníbal Velásquez Valdivia, (2014).
- 692 29. Miranda Cipriano OR, Gómez Guizado GL, Munares García OF, Aquino Vivanco OS. Valores  
693 percentilares del contenido de azúcar, grasas y sodio en alimentos industrializados según etiquetado  
694 expendidos en lima. 2014.
- 695 30. Reglamento de etiquetado de alimentos procesados para consumo humano. Acuerdo  
696 Ministerial 5103. Registro Oficial Suplemento 318 (2014).
- 697 31. Organización Panamericana de la Salud. 53º Consejo Directivo. 66.a Sesión del Comité Regional  
698 de la OMS para las Américas. Washington, D.C.: OPS; 2014.
- 699 32. Proyecto de Ley que modifica diversos artículos de la Ley N° 30021, Ley de promoción de la  
700 alimentación saludable para niños, niñas y adolescentes, Proyecto de Ley 4343/2014-CR (2015).
- 701 33. Aprueban el Reglamento que establece los parámetros técnicos sobre los alimentos y bebidas  
702 no alcohólicas procesados referentes al contenido de azúcar, sodio y grasas saturadas, Decreto Supremo  
703 N° 007-2015-SA (2015).
- 704 34. Proyecto de Ley que modifica a la Ley 30021 "Ley de promoción de la alimentación saludable  
705 para niños, niñas y adolescentes", Proyecto de Ley 4808/2015-CR (2015).
- 706 35. World Health Organization. WHO Regional Office for Europe nutrient profile model. World  
707 Health Organization: Geneva, Switzerland. 2015.
- 708 36. Ministerio de Salud. Reglamento de la Ley de Etiquetado de Alimentos Chile: MINSAL; 2015.
- 709 37. Colegio de Nutricionistas del Perú. Trome: Reclaman ley de comida sana. Lima CNP; 2016.
- 710 38. Decreto Supremo que aprueba el Reglamento de la Ley de promoción de alimentación  
711 saludable, Ley 30021, RM 524-2016/MINSA (2016).
- 712 39. Aprueban el Reglamento que establece el proceso de reducción gradual hasta la eliminación de  
713 las grasas trans en los alimentos y bebidas no alcohólicas procesados industrialmente, DS 033-2016-SA  
714 (2016).
- 715 40. Congreso de la República. Periodo Parlamentario 2016-2021. Sesión de instalación de la Junta  
716 Preparatoria. 2016.
- 717 41. Organización Panamericana de la Salud. Modelo de perfil de nutrientes de la Organización  
718 Panamericana de la Salud. Washington, DC OPS; 2016.
- 719 42. Pedro Pablo Kuczynski asume presidencia de la República [press release]. 2018.
- 720 43. Nombran Ministra de Salud, N° 164-2016-PCM (2016).
- 721 44. Proyecto de Ley 865/2016-CR, (2017).
- 722 45. Proyecto de Ley 1519/2016-CR, (2017).
- 723 46. Congreso de la República. Proyecto de Ley 1589/2016-CR. 2017.
- 724 47. Proyecto de Ley 1700/2016-CR, (2017).
- 725 48. Proyecto de Manual de Advertencias Publicitarias en el marco de lo establecido por la Ley N°  
726 30021, RM 683/2017-MINSA (2017).
- 727 49. Proyecto de Ley 1959/2017-CR, (2017).
- 728 50. Proyecto de Ley 2036/2017-CR, (2017).
- 729 51. Proyecto de Ley del etiquetado de productos alimenticios (2017).
- 730 52. Fernando D'Alessio asumió conducción del Ministerio de Salud [press release]. 2017.



- 731 53. Español Ce. Así fue el camino de Pedro Pablo Kuczynski hasta la renuncia: los escándalos que lo  
732 sacudieron. CNN Latinoamérica 2018.
- 733 54. Conceden indulto y derecho de gracia por razones humanitarias a interno del Establecimiento  
734 Penitenciario Barbadillo, RS N° 281-2017-JUS (2017).
- 735 55. BBC News. ¿Es o no es leche?: la controversia por Pura Vida, el producto del gigante peruano de  
736 los lácteos Grupo Gloria cuya venta fue suspendida en Panamá. 2017.
- 737 56. ASPEC. NutriApp - Aplicativo con Toda La Información Nutricional de Productos. Canal N. 2017.
- 738 57. La República. Colegio de Nutricionistas realizará marcha contra reglamentación de Ley de  
739 Alimentación Saludable. 2017.
- 740 58. Accion Popular impuesta por el Colegio de Nutricionistas del Perú, Expediente 00344-2017-0-  
741 1801-SP-CI-02 (2017).
- 742 59. Ley que establece los parámetros técnicos sobre el contenido de azúcar, sodio y grasa saturada,  
743 y dispone el plazo para su observancia, Proyecto de Ley 2036/2017-CR (2018).
- 744 60. Oficio 061-2018-PR, (2018).
- 745 61. Nombran Ministro de Salud, RS N° 013-2018-PCM (2018).
- 746 62. Resolución Legislativa del Congreso por la que se acepta la renuncia del ciudadano Pedro Pablo  
747 Kuczynski Godard al cargo de Presidente de la República y se declara la vacancia de la Presidencia de la  
748 República, 008-2017-2018-CR (2018).
- 749 63. Andina. Martín Vizcarra juró como nuevo Presidente de la República. Andina Agencia peruana  
750 de noticias 2018.
- 751 64. Nombran Minsitra de Salud RS N° 091-2018-PCM (2018).
- 752 65. Redacción El Comercio. Martín Vizcarra: Fue un error mantener reserva a pedido de Keiko  
753 Fujimori. El Comercio. 2018.
- 754 66. Respuestas del Minsa a las consultas frecuentes sobre el Manual de Advertencias Publicitarias  
755 (2019).
- 756 67. Redacción El Comercio. Octógonos de advertencia: desde hoy rige su implementación en los  
757 productos. El Comercio 2019.
- 758 68. Dictamen. Comisión de Defensa del Consumidor y Organismos Reguladores de los Servicios  
759 Públicos, (2012).
- 760 69. Proyecto de Reglamento que establece los parámetros técnicos sobre los alimentos y bebidas  
761 no alcohólicas procesados referente al alto contenido de azúcar, sodio y grasas saturadas y de la  
762 reducción gradual de grasas trans, (2014).
- 763 70. Peñaflores-Guerra R, Sanagustín-Fons MV, Ramírez-Lozano J. Business Ethics Crisis and Social  
764 Sustainability. The Case of the Product “Pura Vida” in Peru. Sustainability. 2020;12(8):3348.
- 765 71. Proyecto de Reglamento Técnico que Regula Límites de Uso de Ácidos Grasos Trans, en  
766 Alimentos Elaborados Industrialmente, (2012).
- 767 72. Ministerio de Salud. Informe sobre evaluaciones de la Ley N° 20.606 sobre composición  
768 nutricional de los alimentos y su publicidad. Chile: Ministerio de Salud de Chile; 2021.
- 769 73. Paraje G, Colchero A, Wlasiuk JM, Sota AM, Popkin BM. The effects of the Chilean food policy  
770 package on aggregate employment and real wages. Food Policy. 2021;100:102016.
- 771 74. Oficio N° 061-2018-PR, (2018).
- 772 75. Fowks J. El Congreso peruano suspende al legislador Kenji Fujimori. El País. 2018.
- 773 76. Ministerio de Salud. Informe de evaluación de la implementación de la Ley sobre composición  
774 nutricional de los alimentos y su publicidad. Chile: MINSAL; 2018.
- 775 77. Valverde-Aguilar M, Espadín-Alemán CC, Torres- Ramos NE, Liria-Domínguez R. Preferencia de  
776 etiquetado nutricional frontal: octógono frente a semáforo GDA en mercados de Lima, Perú. Acta  
777 Médica Peruana. 2018;35:145-52.

- 778 78. Tórtora G, Machín L, Ares G. Influence of nutritional warnings and other label features on  
779 consumers' choice: Results from an eye-tracking study. *Food Research International*. 2019;119:605-11.
- 780 79. Machín L, Aschemann-Witzel J, Curutchet MR, Giménez A, Ares G. Traffic Light System Can  
781 Increase Healthfulness Perception: Implications for Policy Making. *Journal of Nutrition Education and*  
782 *Behavior*. 2018;50(7):668-74.
- 783 80. Mialon M, Corvalan C, Cediel G, Scagliusi FB, Reyes M. Food industry political practices in Chile:  
784 “the economy has always been the main concern”. *Globalization and Health*. 2020;16(1).
- 785 81. Mialon M, Gaitan Charry DA, Cediel G, Crosbie E, Baeza Scagliusi F, Pérez Tamayo EM. “The  
786 architecture of the state was transformed in favour of the interests of companies”: corporate political  
787 activity of the food industry in Colombia. *Globalization and Health*. 2020;16(1).
- 788 82. Mialon M, Gaitan Charry DA, Cediel G, Crosbie E, Scagliusi FB, Perez Tamayo EM. ‘I had never  
789 seen so many lobbyists’: food industry political practices during the development of a new nutrition  
790 front-of-pack labelling system in Colombia. *Public Health Nutrition*. 2021;24(9):2737-45.
- 791 83. Mialon M, Khandpur N, Amaral Mais L, Bortoletto Martins AP. Arguments used by trade  
792 associations during the early development of a new front-of-pack nutrition labelling system in Brazil.  
793 *Public Health Nutrition*. 2021;24(4):766-74.
- 794 84. Reyes M, Garmendia ML, Olivares S, Aqueveque C, Zacarías I, Corvalán C. Development of the  
795 Chilean front-of-package food warning label. *BMC Public Health*. 2019;19(1).
- 796 85. Khan MM, Van den Heuvel W. The impact of political context upon the health policy process in  
797 Pakistan. *Public Health*. 2007;121(4):278-86.

798

799

800

801 **Supplementary Material 1**

802 **Code book**

803 (K) = Codes aligned with the Kaleidoscope Model's variables

804 **1. Law**

805 1.1 (K) Champions during the Design

806 1.2 (K) Purpose of having nutritional warnings and/or designing a Law that includes the nutritional  
807 warnings

808 1.3 Documents (Law, bills)

809 1.3.1 Bills (2012)

810 1.3.2 Dictum (2013)

811 1.3.3 Approved Law (2013)

812 1.3.4 (K) Studies/reports conducted or used during the Law's design

813 1.3.5 Experiences of warnings or legislation in other countries

814 1.4 Descriptions and opinions about the Law

815 1.4.1 About the parameters

816 1.4.2 About the nutritional warnings

817 1.5 Stakeholders' postures/actions during the design and approval of the Law

818 1.5.1 Food industry's postures/actions

819 1.5.2 Media (TV, newspapers, journalists)'s postures/actions

820 1.5.3 Civil society organizations' postures/actions

821 1.5.4 Congress's postures/actions

822 1.5.5 Ministry of Health's postures/actions

823 1.5.6 Other government stakeholders' postures/actions

It is made available under a [CC-BY-NC-ND 4.0 International license](#) .

- 824 1.5.7 PAHO/WHO's postures/actions
- 825 1.5.8 Other stakeholders' postures/actions
- 826 1.6 Difficulties for the design and/or approval of the Law
  - 827 1.6.1 Specific difficulties: Lack of evidence
  - 828 1.6.2 Specific difficulties: Power of the food industry
  - 829 1.6.3 Specific difficulties: Power of opponents in the government
  - 830 1.6.4 Specific difficulties: Power of other opponents
- 831 1.7 Enablers: Facts/actions that helped the Law to be designed and/or approved
  - 832 1.7.1 (K) Non-planned enablers. Facts that positioned the Law and nutritional warnings
  - 833 1.7.2 Intentional enablers. Actions/decisions taken so that the Law could be designed
  - 834 and/or approved
    - 835 1.7.2.1 Intentional enablers. Actions/decisions that worked/were helpful
- 836 1.8 Recommendations or ideas that could enhance the Healthy Eating Law
  - 837 1.8.1 Explicit recommendations
  - 838 1.8.2 Proposals that got lost along the way
  - 839 1.8.3 What could have been done differently
  - 840 1.8.4 Critics
- 841 1.9 General assessments of the Law
  - 842 1.10 Recommendations for other future policies (other than the Law and the octagons)
  - 843 1.11 Law. Other topics
- 844 **2. Regulation of the Law**
  - 845 2.1 (K) Purpose of having a Regulation
  - 846 2.2 Documents (Regulation, drafts)

- 847                    2.2.1    First Regulation's draft (2014)
- 848                    2.2.2    Approval of parameters for sugar, sodium, and saturated fats (2015)
- 849                    2.2.3    Second Regulation's draft (2016)
- 850                    2.2.4    Approval of parameters for trans fat (2016)
- 851                    2.2.5    Approved Regulation (2017)
- 852                    2.2.6    (K) Studies/reports conducted or used during the Regulation's design
- 853                    2.3    Descriptions and opinions about the Regulation and its drafts
- 854                    2.3.1    About the parameters of the First Regulation's Draft (Local data)
- 855                    2.3.2    About the parameters of the Second Regulation's Draft (PAHO)
- 856                    2.3.3    About the parameters of the approved Regulation (Chilean)
- 857                    2.4    Stakeholders' postures/actions during the design of the second Regulation's draft
- 858                    2.4.1    Food industry's postures/actions
- 859                    2.4.2    Civil society organizations' postures/actions
- 860                    2.4.3    Ministry of Health's postures/actions
- 861                    2.4.4    Other government stakeholders' postures/actions
- 862                    2.4.5    PAHO/WHO's postures/actions
- 863                    2.4.6    Other stakeholders' postures/actions
- 864                    2.5    Stakeholders' postures/actions during the design of the approved Regulation
- 865                    2.5.1    Food industry's postures/actions
- 866                    2.5.2    Civil society organizations' postures/actions
- 867                    2.5.3    Ministry of Health's postures/actions
- 868                    2.5.4    Other government stakeholders' postures/actions

- 869                   2.5.5   PAHO/WHO's postures/actions
- 870                   2.5.6   Other stakeholders' postures/actions
- 871                   2.6 Difficulties for the design and/or approval of the Regulation
- 872                   2.6.1   Specific difficulties: Lack of evidence
- 873                   2.6.2   Specific difficulties: Power of the food industry
- 874                   2.6.3   Specific difficulties: Power of opponents in the government
- 875                   2.6.4   Specific difficulties: Power of other opponents
- 876                   2.7 Enablers: Facts/actions that helped the Regulation to be designed and/or approved
- 877                   2.7.1   (K) Non-planned enablers. Facts that positioned the Regulation
- 878                   2.7.2   Intentional enablers. Actions/decisions taken so that the Regulation could be
- 879                                           designed and/or approved
- 880                                           2.7.2.1 Intentional enablers. Actions/decisions that worked/were helpful
- 881                   2.8 Recommendations or ideas that could enhance the Regulation
- 882                   2.8.1   Explicit recommendations
- 883                   2.8.2   Proposals that got lost along the way
- 884                   2.8.3   What could have been done differently
- 885                   2.8.4   Critics
- 886                   2.9 General assessments of the Regulation
- 887                   2.9.1   Reasons for the delay between the Law and the Regulation
- 888                   2.10   Regulation: Other topics
- 889   **3. Nutritional Warnings' Manual**
- 890                   3.1 (K) Purpose of having the Manual
- 891                   3.2 Documents (Manual, drafts)

- 892                    3.2.1    Manual's draft (2017)
- 893                    3.2.2    Approved Manual (2018)
- 894                    3.2.3    (K) Studies/reports conducted or used during the Manual's design
- 895                    3.3    Descriptions and opinions about the Manual and its draft
- 896                    3.4    Stakeholders' postures/actions during the design of the Manual's draft
- 897                    3.4.1    Ministry of Health's postures/actions
- 898                    3.4.2    Other stakeholders' postures/actions
- 899                    3.5    Stakeholders' postures/actions during the design of the approved Manual
- 900                    3.5.1    Food industry's postures/actions
- 901                    3.5.2    Civil society organizations' postures/actions
- 902                    3.5.3    Ministry of Health's postures/actions
- 903                    3.5.4    Other government stakeholders' postures/actions
- 904                    3.5.5    Other stakeholders' postures/actions
- 905                    3.6    Difficulties for the design and/or approval of the Manual
- 906                    3.6.1    Specific difficulties: Lack of evidence
- 907                    3.6.2    Specific difficulties: Power of the food industry
- 908                    3.6.3    Specific difficulties: Power of opponents in the government
- 909                    3.6.4    Specific difficulties: Power of other opponents
- 910                    3.7    Enablers: Facts/actions that helped the Manual to be designed and/or approved
- 911                    3.7.1    (K) Non-planned enablers. Facts that positioned the Manual
- 912                    3.7.2    Intentional enablers. Actions/decisions taken so that the Manual could be
- 913                                            designed and/or approved
- 914                    3.7.2.1    Intentional enablers. Actions/decisions that worked/were helpful

|     |                                                                        |
|-----|------------------------------------------------------------------------|
| 915 | 3.8 Recommendations or ideas that could enhance the Manual             |
| 916 | 3.8.1 Explicit recommendations                                         |
| 917 | 3.8.2 Proposals that got lost along the way                            |
| 918 | 3.8.3 What could have been done differently                            |
| 919 | 3.8.4 Critics                                                          |
| 920 | 3.9 General assessments of the Manual                                  |
| 921 | 3.9.1 Assessments of the octagons as a nutritional warning model       |
| 922 | 3.9.1.1 Reasons why it was decided to use octagons                     |
| 923 | 3.9.2 Assessments of other warnings' designs (Traffic light, GDA)      |
| 924 | 3.10 Manual: Other topics                                              |
| 925 | <b>4. Bills to amend the Law (and Regulation)</b>                      |
| 926 | 4.1 Postures/actions of stakeholders in favor of the Law               |
| 927 | 4.2 Postures/actions of opponents of the Law                           |
| 928 | 4.3 Power of opponents of the Law                                      |
| 929 | 4.4 Enablers: Facts/actions that helped that the bills did not prosper |
| 930 | <b>5. Comprehensive evaluations of all the documents</b>               |
| 931 | <b>6. Comprehensive evaluations of all the stakeholders</b>            |
| 932 |                                                                        |
| 933 |                                                                        |
| 934 |                                                                        |
| 935 |                                                                        |



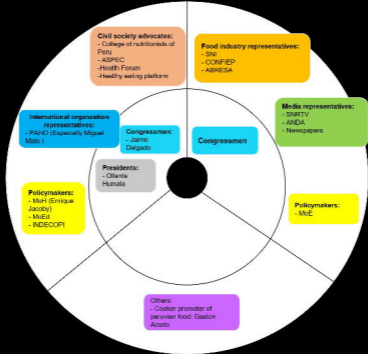

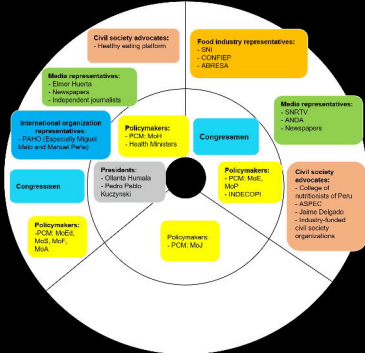

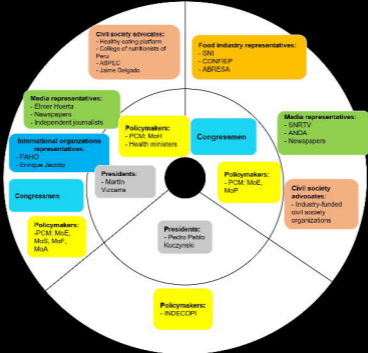

High in saturated fat – Sugar – Sodium:  
Avoid its excessive consumption

Contains trans fat:  
Avoid its consumption

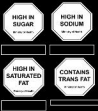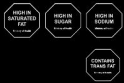

2013: Law 30021\*

2016: 2° Regulation Draft

2018: Nutritional Warnings\* Manual\*

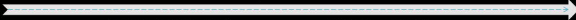

2014: 1° Regulation Draft

2017: Manual Draft\*

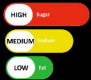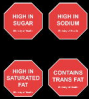

Source: https://medrxiv.org/content/10.1101/2022.09.12.22279683v1.full.pdf
